# Supplementary material
Source: publisher figshare collection journal article supplement (https://geolsoc.figshare.com/ndownloader/files/31560714)
Supplement: Supplementary file 1 [file 31560714]

## Sheet: Sheet1
Sample	SratLev	StratLevR	StratDiff (calculated)	Dec	DecErr	Inc	a95	N	R	K	VGPLong	Plat	VGPLat	MAD
Q-1	0	0	0	198	62	11	61	3	2.62	5	166	5	-68	29	Rejected
Q-2	20	20	20	170	96	41	73	3	2.49	4	356	23	-80	33
Q-37	39	39	19	127	11	16	11	3	2.99	136	26	8	-38	6
Q-3	40	40	1	30	68	62	32	3	2.87	16	315	43	22	17
Q-38	58	58	18	18	133	5	133	3	2.02	2	333	3	62	46	Rejected
Q-4	60	60	2	293	103	-29	90	3	1.22	1	194	-16	27	62	Rejected
Q-5	80	80	20	33	33	35	27	3	2.91	22	334	19	40	14
Q-6	100	100	20	348	9	-14	9	3	2.99	202	246	-7	74	5	Rejected
Q-7	120	120	20	354	104	-23	96	3	2.28	3	251	-12	81	40
Q-8	140	140	20	135	4	34	4	3	3	1233	15	19	-47	2
Q-9	160	160	20	149	25	-31	21	4	3.85	20	69	-17	-43	16
Q-39	162	162	2	151	19	12	19	3	2.95	43	43	6	-59	10
Q-10	180	180	18	7	21	-27	19	3	2.95	44	347	-14	82	10
Q-11	200	200	20	160	18	29	16	3	2.97	64	28	16	-70	8
Q-40	201	201	1	138	17	27	15	3	2.97	71	22	14	-49	8
Q-12	220	220	19	87	95	19	90	3	1.58	1	12	10	0	56	Rejected
Q-13	240	240	20	348	106	-63	49	3	2.73	7	131	-44	63	24	Rejected
Q-41	242	242	2	319	88	-21	83	3	2.4	3	208	-11	49	36
Q-14	260	260	18	348	27	-34	22	3	2.94	32	203	-18	78	12
Q-42	261	261	1	323	11	-15	11	3	2.98	133	214	-8	53	6	Rejected
Q-15	280	280	19	138	59	15	57	3	2.65	6	32	7	-48	28
Q-16	300	300	20	156	11	37	9	3	2.99	198	14	20	-68	5
Q-17	320	320	20	86	30	46	21	3	2.94	36	355	27	-5	11
Q-43	321	321	1	273	39	47	27	3	2.91	23	229	28	-6	14
Q-18	340	340	19	111	10	14	10	3	2.99	161	22	7	-22	5
Q-19	360	360	20	189	68	36	55	3	2.67	6	209	20	-81	27
Q-44	374	374	14	319	16	18	15	3	2.97	66	233	9	41	8	Rejected
Q-20	380	380	6	266	111	36	90	3	1.5	1	219	20	-10	57
Q-21	400	400	20	95	230	67	91	3	2.32	3	335	49	-17	39	Rejected
Q-45	401	401	1	247	19	49	12	3	2.98	104	226	30	-29	6
Q-22	420	420	19	104	104	30	90	3	1.63	1	11	16	-18	55	Rejected
Q-46	421	421	1	37	69	59	36	3	2.53	13	322	39	22	18	Rejected
Q-23	440	440	19	131	32	20	30	3	2.89	18	25	-42		16	Rejected
Q-24	460	460	20	159	23	19	22	3	2.94	33	43	10	-68	11
Q-25	480	480	20	90	42	24	38	3	2.83	12	10	12	-4	19
Q-47	481	481	1	118	37	25	34	3	2.86	14	18	13	-30	17
Q-48	500	500	19	140	17	43	13	3	2.98	98	6	25	-53	7
Q-27	520	520	20	144	11	26	10	3	2.99	148	25	14	-55	5
Q-28	540	540	20	151	26	34	21	3	2.94	35	18	19	-63	11
Q-29	560	560	20	141	37	31	32	3	2.88	16	20	16	-53	16
Q-30	580	580	20	137	16	40	12	3	2.98	101	9	23	-49	7
Q-31	600	600	20	1	126	-44	90	3	1.67	2	103	-26	83	54	Rejected
Q-49	601	601	1	292	20	-43	14	3	2.97	73	183	-25	27	8
Q-32	620	620	19	338	20	-48	14	3	2.98	84	171	-29	68	7
Q-33	640	640	20	346	24	-37	19	3	2.95	44	192	-21	77	10
Q-34	660	660	20	311	13	-40	10	3	2.99	162	189	-23	45	5
Q-51	672	672	12	325	32	-57	17	3	2.96	51	163	-38	54	9
Q-35	680	680	8	8	90	2	90	3	0.89	1	313	1	68	68	Rejected
Q-50	681	681	1	306	90	-6	90	3	0.93	1	212	-3	35	67	Rejected
Q-53	701	701	20	118	70	43	51	3	2.71	7	4	25	-32	25
Q-54	713.8	713.8	12.8	151	3	27	3	3	3	1866	28	14	-62	2
Q-36	727	727	13.2	322	5	-28	4	3	3	895	203	-15	54	2
Q-55	727.5	727.5	0.5	275	65	13	63	3	2.59	5	210	6	3	30	Rejected
Q-56	740.2	740.2	12.7	10	117	-28	104	3	2.21	3	359	-15	80	42	Rejected
Q-57	764.3	764.3	24.1	177	28	54	17	3	2.96	56	300	34	-75	9
Q-58	787.7	787.7	23.4	142	19	19	18	3	2.96	49	30	10	-52	9
Q-59	809.5	809.5	21.8	146	22	8	22	3	2.94	33	43	4	-54	11
Q-60	822.7	822.7	13.2	143	92	-13	90	3	1.1	1	53	-7	-45	64	Rejected
Q-61	844.1	844.1	21.4	154	19	43	14	3	2.98	81	4	25	-65	7
Q-62	859.1	859.1	15	165	25	18	23	3	2.93	29	53	9	-72	12
Q-63	877.1	877.1	18	138	19	29	16	3	2.97	58	21	15	-50	9
Q-64	897.9	897.9	20.8	127	23	55	13	3	2.98	87	351	36	-41	7
Q-65	909.5	909.5	11.6	144	2	31	2	3	3	5269	20	17	-55	1
Q-66	935.8	935.8	26.3	137	11	33	10	3	2.99	168	17	18	-50	5
Q-67	955.8	955.8	20	149	25	40	19	3	2.95	41	9	23	-61	10
Q-68	973.3	973.3	17.5	117	32	65	13	3	2.98	87	337	47	-32	7
Q-69	993.9	993.9	20.6	143	5	29	4	3	3	767	22	15	-54	2
Q-70	1011.2	1011.2	17.3	119	24	50	15	3	2.97	66	357	30	-34	8
Q-71	1026.8	1026.8	15.6	144	8	30	7	3	2.99	289	21	16	-56	4
Q-72	1042	1042	15.2	145	9	31	8	3	2.99	235	20	17	-57	4
Q-73	1063	1063	21	113	12	31	11	3	2.99	133	12	17	-27	6
Q-74	1087.3	1087.3	24.3	145	19	14	19	3	2.96	45	36	7	-54	10
Q-75	1094.4	1094.4	7.1	144	54	-17	52	3	2.71	7	56	-9	-45	25
Q-76	1109.8	1109.8	15.4	149	48	61	23	3	2.93	30	333	42	-55	12
Q-77	1155.9	1155.9	46.1	132	8	16	8	3	2.99	232	28	8	-43	4
Q-78	1176.5	1176.5	20.6	143	23	24	21	3	2.94	34	27	12	-53	11
Q-79	1196.9	1196.9	20.4	180	21	23	19	3	2.95	43	115	12	-83	10
Q-80	1214.5	1214.5	17.6	166	54	38	43	3	2.79	9	9	21	-77	22
Q-81	1227.1	1227.1	12.6	165	34	56	19	3	2.96	45	325	37	-68	10
Q-82	1238.3	1238.3	11.2	130	48	40	37	3	2.84	12	9	23	-43	19
Q-83	1254.8	1254.8	16.5	141	13	10	13	3	2.98	96	37	5	-49	7
Q-84	1275.8	1275.8	21	62	76	69	27	3	2.47	21	325	52	1	14	Rejected
Q-85	1298.5	1298.5	22.7	143	13	24	11	3	2.98	116	26	13	-54	6
Q-86	1318.8	1318.8	20.3	158	11	27	10	3	2.99	152	31	14	-68	5
Q-87	1333.2	1333.2	14.4	122	7	26	6	3	3	400	18	14	-34	3
Q-88	1351.2	1351.2	18	125	20	26	18	3	2.96	51	19	14	-37	9
Q-89	1367.7	1367.7	16.5	126	19	40	15	3	2.97	72	8	23	-39	8
Q-90	1385.9	1385.9	18.2	156	8	27	8	3	2.99	268	30	14	-66	4
Q-91	1402.3	1402.3	16.4	165	15	41	11	3	2.98	123	1	24	-75	6
Q-92	1416.1	1416.1	13.8	154	16	45	11	3	2.98	129	359	27	-65	6
Q-93	1427.3	1427.3	11.2	145	14	32	12	3	2.98	113	19	17	-56	6
Q-94	1455.8	1455.8	28.5	125	14	25	12	3	2.98	101	20	13	-37	7
Q-95	1497.2	1497.2	41.4	79	3070	89	67	3	2.55	4	295	87	-19	31
Q-96	1515.1	1515.1	17.9	173	27	30	24	3	2.93	28	44	16	-83	13
Q-97	1539.7	1539.7	24.6	171	10	-8	10	3	2.99	161	90	-4	-65	5
Q-98	1558.7	1558.7	19	181	139	-13	135	3	2.01	2	115	-7	-64	47
Q-99	1575.1	1575.1	16.4	152	14	41	11	3	2.98	128	8	23	-64	6
Q-100	1595.4	1595.4	20.3	143	8	29	7	3	2.99	288	22	15	-55	4
Q-101	1609.4	1609.4	14	154	16	28	14	3	2.97	80	28	15	-65	7
Q-102	1634.6	1634.6	25.2	158	13	33	11	3	2.99	137	21	18	-70	6
Q-103	1662.6	1662.6	28	190	19	39	15	3	2.97	70	221	22	-81	8
Q-104	1670.8	1670.8	8.2	350	10	-29	8	3	2.99	219	221	-16	80	4
Q-105	1689.2	1689.2	18.4	297	50	-20	47	3	2.74	8	201	-10	29	24
Q-106	1705.1	1705.1	15.9	310	23	-1	23	3	2.93	29	217	-1	38	12
Q-107	1716.5	1716.5	11.4	331	35	-34	29	3	2.89	19	198	-19	62	15
Q-108	1741.9	1741.9	25.4	331	20	-49	13	3	2.98	91	173	-30	62	7
Q-109	1781.9	1781.9	40	322	8	-45	5	3	3	535	183	-27	54	3
Q-110	1801.8	1801.8	19.9	295	54	-9	54	3	2.69	6	206	-5	25	26
Q-111	1819.8	1819.8	18	323	15	-42	11	3	2.98	130	187	-24	56	6
Q-112	1836.4	1836.4	16.6	336	21	-17	20	3	2.95	40	223	-8	64	10
Q-113	1851.8	1851.8	15.4	34	32	-48	21	3	2.94	35	47	-29	57	11
Q-114	1868	1868	16.2	352	21	-28	19	3	2.96	45	232	-15	82	10
Q-115	1880	1880	12	341	22	-35	18	3	2.96	50	198	-19	72	9
Q-116	1899.8	1899.8	19.8	140	7	12	7	3	2.99	359	35	6	-49	3
Q-117	1919.8	1919.8	20	159	25	49	17	3	2.96	56	348	30	-68	9
Q-118	1938.2	1938.2	18.4	149	39	64	17	3	2.96	53	329	46	-53	9
Q-119	1956.4	1956.4	18.2	148	11	22	11	3	2.99	139	31	11	-58	6
Q-120	1976.5	1976.5	20.1	148	141	63	63	3	2.59	5	330	45	-53	30
Q-121	1996.4	1996.4	19.9	136	14	26	12	3	2.98	100	22	14	-47	7
Q-122	2015.2	2015.2	18.8	135	16	44	11	3	2.98	116	4	26	-48	6
Q-123	2032.2	2032.2	17	142	17	23	16	3	2.97	64	27	12	-53	8
Q-124	2051.8	2051.8	19.6	141	45	43	34	3	2.86	15	6	25	-54	17
Q-125	2069.1	2069.1	17.3	140	8	19	8	3	2.99	269	29	10	-50	4
Q-126	2089.6	2089.6	20.5	102	36	29	31	3	2.88	17	11	15	-16	16
Q-127	2109.8	2109.8	20.2	129	25	29	22	3	2.94	33	18	15	-41	12
Q-128	2128	2128	18.2	126	17	37	14	3	2.98	83	11	20	-39	7
Q-129	2164.6	2164.6	36.6	359	11	6	11	3	2.98	122	290	3	68	6
Q-130	2189.1	2189.1	24.5	151	17	8	16	3	2.97	58	46	4	-58	9
Q-131	2208.6	2208.6	19.5	145	17	-4	17	3	2.96	52	49	-2	-49	9
Q-132	2226.4	2226.4	17.8	310	14	-32	12	3	2.98	106	196	-17	43	6
Q-133	2251.4	2251.4	25	329	27	-50	17	3	2.96	52	173	-31	60	9
Q-134	2270.4	2270.4	19	300	25	-21	23	3	2.93	29	201	-11	32	12
Q-135	2290.5	2290.5	20.1	321	20	-7	20	3	2.95	39	219	-3	49	11
Q-136	2310.5	2310.5	20	1	44	-24	40	3	2.81	11	302	-12	83	20
Q-137	2332.5	2332.5	22	323	11	-13	10	3	2.99	142	217	-6	52	6
Q-138	2353.5	2353.5	21	321	32	-38	26	3	2.92	24	191	-21	54	13
Q-139	2373.5	2373.5	20	300	32	-31	28	3	2.9	21	194	-17	33	15
Q-140	2395	2395	21.5	330	22	-23	20	3	2.95	39	211	-12	60	11
Q-141	2413.4	2413.4	18.4	330	93	-14	90	3	1.41	1	221	-7	59	59
Q-142	2432.8	2432.8	19.4	333	30	-36	24	3	2.93	27	195	-20	65	13
Q-143	2455.1	2455.1	22.3	300	66	-13	65	3	2.57	5	206	-6	31	31
Q-144	2474.6	2474.6	19.5	329	13	-23	12	3	2.98	111	210	-12	59	6
Q-145	2486.9	2486.9	12.3	325	11	-20	10	3	2.99	148	211	-10	55	5
Q-146	2504.9	2504.9	18	190	124	65	53	3	2.69	7	278	47	-61	26
Q-147	2520	2520	15.1	196	42	41	32	3	2.88	16	222	24	-74	16
Q-148	2541.2	2541.2	21.2	121	30	21	28	3	2.9	21	21	11	-33	15
Q-149	2559	2559	17.8	310	27	-54	16	3	2.97	60	172	-34	44	9
Q-150	2577.4	2577.4	18.4	324	6	-20	6	3	3	475	211	-11	54	3
Q-151	2597.4	2597.4	20	309	10	-39	8	3	2.99	243	189	-22	43	4
Q-152	2617.4	2617.4	20	353	17	-18	16	3	2.97	59	257	-9	78	9
Q-153	2639.9	2639.9	22.5	307	11	-36	9	3	2.99	206	191	-20	40	5
Q-154	2659.9	2659.9	20	317	26	-12	26	3	2.92	24	213	-6	46	13
Q-155	2679.9	2679.9	20	294	33	-19	32	3	2.88	16	200	-10	25	16
Q-156	2699.9	2699.9	20	349	37	-33	31	3	2.88	17	206	-18	80	16
Q-157	2719.9	2719.9	20	317	28	-52	17	3	2.96	51	174	-32	50	9
Q-158	2739.9	2739.9	20	59	41	-65	17	3	2.96	52	67	-47	35	9
Q-159	2759.9	2759.9	20	138	17	16	17	3	2.96	57	31	8	-48	9
Q-160	2779.9	2779.9	20	154	9	23	8	3	2.99	220	34	12	-64	4
Q-161	2799.9	2799.9	20	135	24	-21	22	3	2.94	33	52	-11	-36	12
Q-162	2822.1	2822.1	22.2	187	59	7	58	3	2.64	6	137	3	-73	28
Q-163	2842.1	2842.1	20	231	120	42	90	3	1.28	1	217	24	-43	61
Q-164	2862.2	2862.2	20.1	123	115	31	98	3	2.26	3	14	17	-36	40
Q-165	2882.2	2882.2	20	124	46	34	38	3	2.83	12	12	19	-37	19
Q-166	2901.7	2901.7	19.5	145	11	38	9	3	2.99	201	11	22	-58	5
Q-167	2921.7	2921.7	20	123	23	43	17	3	2.96	54	4	25	-37	9
Q-168	2941.7	2941.7	20	176	33	46	23	3	2.93	30	315	27	-81	12
Q-169	2961.7	2961.7	20	135	16	31	14	3	2.98	80	18	17	-47	7
Q-170	2981.7	2981.7	20	87	19	24	17	3	2.96	51	9	13	-2	9
Q-171	3001.7	3001.7	20	143	47	41	35	3	2.85	13	8	24	-55	18
Q-172	3027.2	3027.2	25.5	141	17	27	15	3	2.97	66	23	14	-53	8
Q-173	3047.2	3047.2	20	173	62	65	26	3	2.91	23	302	47	-61	14
Q-174	3063.7	3063.7	16.5	168	12	15	11	3	2.98	125	63	8	-74	6
Q-175	3083.7	3083.7	20	185	93	14	90	3	1.59	1	137	7	-77	56
Q-176	3095.3	3095.3	11.6	150	6	29	5	3	3	649	24	16	-62	3
Q-177	3115.3	3115.3	20	142	17	1	17	3	2.96	52	44	1	-49	9
Q-178	3135.3	3135.3	20	164	118	35	97	3	2.27	3	19	19	-74	40
Q-179	3155.3	3155.3	20	18	61	68	23	3	2.93	31	304	52	18	12	Rejected
Q-180	3175.3	3175.3	20	128	4	33	3	3	3	1491	15	18	-41	2
Q-181	3195.3	3195.3	20	115	29	59	15	3	2.97	69	347	40	-31	8
Q-182	3215.3	3215.3	20	134	27	19	26	3	2.92	24	27	10	-45	14
Q-183	3235.3	3235.3	20	140	13	21	12	3	2.98	104	28	11	-50	6
Q-184	3255.3	3255.3	20	161	12	7	12	3	2.98	107	59	4	-66	6
Q-185	3275.3	3275.3	20	149	9	40	7	3	2.99	333	8	23	-61	4
Q-186	3309.3	3309.3	34	329	100	-30	86	3	2.36	3	203	-16	61	37	Rejected
Q-187	3333.6	3333.6	24.3	307	28	7	28	3	2.9	21	219	3	33	15	Rejected
Q-188	3357.7	3357.7	24.1	5	65	-28	58	3	2.64	6	343	-15	83	28	Rejected
Q-189	3366.2	3366.2	8.5	195	29	8	29	3	2.9	20	158	4	-69	15
Q-190	3407.7	3407.7	41.5	46	24	-36	19	3	2.95	43	32	-20	47	10	Rejected
Q-191	3408.7	3408.7	1	191	22	59	12	3	2.98	113	269	39	-68	6
Q-192	3466.7	3466.7	58	153	48	28	42	3	2.79	10	27	15	-64	21
Q-193	3481.7	3481.7	15	352	62	-47	42	3	2.79	9	150	-28	79	21	Rejected
Q-194	3526.7	3526.7	45	148	130	-17	125	3	2.06	2	60	-8	-48	45	Rejected
Q-195	3726.7	4326.7	800	146	10	40	7	3	2.99	283	9	23	-58	4
Q-196	3758.9	4358.9	32.2	159	26	24	24	3	2.93	28	37	12	-68	13
Q-197	3785.8	4385.8	26.9	190	9	16	8	3	2.99	227	157	8	-75	4
Q-198	3809.6	4409.6	23.8	107	16	40	12	3	2.98	106	4	23	-22	6
Q-199	3841.4	4441.4	31.8	90	26	5	26	3	2.91	23	20	3	-1	14
Q-200	3864.3	4464.3	22.9	84	128	45	90	3	1.12	1	355	27	-3	64	Rejected
Q201	21.2	4485.5	21.2	259	24	23	-11	3	2.93	29	193	-5	-9	12
Q202	42.2	4506.5	21	314	36	32	-29	3	2.88	16	199	-16	46	16
Q203	63.5	4527.8	21.3	324	27	24	-27	3	2.93	28	204	-14	56	12
Q204	83.9	4548.2	20.4	211	10	10	-1	3	2.99	163	173	-1	-54	5	Rejected
Q205	102.4	4566.7	18.5	9	20	19	-16	3	2.95	41	333	-8	76	10
Q206	122.7	4587	20.3	14	16	16	18	3	2.97	62	319	9	59	8
Q207	140.8	4605.1	18.1	295	48	39	-37	3	2.82	11	189	-20	29	20
Q208	164.3	4628.6	23.5	340	12	12	-5	3	2.98	108	239	-3	64	6
Q209	186.8	4651.1	22.5	241	33	30	26	3	2.89	18	207	13	-31	16
Q210	207.5	4671.8	20.7	141	9	9	11	3	2.99	205	36	5	-49	5
Q211	230.7	4695	23.2	47	103	90	29	3	1.47	1	348	15	33	58	Rejected
Q212	249.6	4713.9	18.9	308	8	7	-18	3	2.99	272	205	-9	38	4
Q213	269.7	4734	20.1	356	91	90	-7	3	1.58	1	277	-4	74	56
Q214	293.1	4757.4	23.4	157	4	4	24	3	3	1199	34	13	-67	2
Q215	318	4782.3	24.9	36	77	71	-24	3	2.51	4	17	-12	55	33	Rejected
Q216	339	4803.3	21	340	15	15	-3	3	2.97	70	241	-1	64	8
Q217	359.1	4823.4	20.1	35	38	25	50	3	2.92	26	327	31	30	13
Q218	378	4842.3	18.9	337	82	79	17	3	2.44	4	251	9	54	35
Q219	414	4878.3	36	156	148	148	0	3	1.96	2	59	0	-60	48	Rejected
Q220	429	4893.3	15	123	50	40	37	3	2.81	11	10	21	-36	20	Rejected
Q221	452.5	4916.8	23.5	141	81	81	6	3	2.42	3	40	3	-49	36	Rejected
Q222	487.5	4951.8	35	155	118	118	-1	3	2.11	2	57	-1	-58	44
Q223	508.1	4972.4	20.6	134	6	6	-9	3	3	469	45	-5	-39	3	Rejected
Q224	527.9	4992.2	19.8	110	52	52	-8	3	2.7	7	32	-4	-17	25
Q225	546.6	5010.9	18.7	4	8	8	15	3	2.99	245	300	7	63	4
Q226	563.6	5027.9	17	334	18	15	-34	3	2.97	71	199	-18	65	8
Q227	581.8	5046.1	18.2	12	11	11	-1	3	2.98	127	325	0	68	6
Q228	605.9	5070.2	24.1	118	24	23	14	3	2.93	30	24	7	-28	12
Q229	625.9	5090.2	20	144	24	21	29	3	2.94	35	22	16	-55	11
Q230	644.9	5109.2	19	73	22	22	3	3	2.94	32	15	1	16	12	Rejected
Q231	661.9	5126.2	17	265	115	106	23	3	2.2	2	212	12	-9	42
Q232	679.2	5143.5	17.3	219	14	14	17	3	2.98	83	192	9	-51	7
Q233	699.8	5164.1	20.6	317	9	9	14	3	2.99	210	230	7	40	5	Rejected
Q234	724	5188.3	24.2	123	14	14	-5	3	2.97	76	37	-2	-30	8
Q235	743.5	5207.8	19.5	153	25	24	22	3	2.93	28	34	11	-63	12
Q236	759.1	5223.4	15.6	92	132	90	47	3	1.46	1	356	28	-11	58	Rejected
Q237	787.2	5251.5	28.1	118	211	94	64	3	2.29	3	340	45	-33	39	Rejected
Q238	808.8	5273.1	21.6	168	18	14	39	3	2.97	79	4	22	-78	7
Q239	827.5	5291.8	18.7	122	23	11	61	3	2.98	119	344	42	-36	6
Q240	845.9	5310.2	18.4	141	33	30	23	3	2.89	18	27	12	-52	16
Q241	865.3	5329.6	19.4	140	50	38	40	3	2.83	12	9	23	-53	19
Q242	880.1	5344.4	14.8	123	9	9	16	3	2.99	190	25	8	-33	5
Q243	913.9	5378.2	33.8	344	61	56	23	3	2.66	6	264	12	55	27	Rejected
Q244	929	5393.3	15.1	185	73	50	47	3	2.72	7	267	28	-80	25
Q245	945.2	5409.5	16.2	131	35	33	21	3	2.87	15	24	11	-42	17
Q246	965.9	5430.2	20.7	171	20	13	51	3	2.98	96	322	32	-75	7
Q247	986.4	5450.7	20.5	137	72	65	26	3	2.58	5	23	14	-49	30
Q248	1007.1	5471.4	20.7	161	28	27	-13	3	2.91	22	74	-6	-58	14
Q249	1031.4	5495.7	24.3	330	109	90	35	3	1.16	1	253	19	42	63	Rejected
Q250	1054.9	5519.2	23.5	17	28	28	3	3	2.9	20	333	2	63	15
Q251	1073.7	5538	18.8	168	73	55	41	3	2.68	6	358	24	-78	27
Q252	1091.1	5555.4	17.4	147	43	31	43	3	2.88	17	5	25	-59	16
Q253	1111.6	5575.9	20.5	155	29	26	26	3	2.91	23	30	14	-65	14
Q254	1131.8	5596.1	20.2	163	24	20	32	3	2.95	39	25	17	-74	11
Q255	1150.8	5615.1	19	331	95	90	19	3	1.51	1	244	10	49	57	Rejected
Q256	1171.9	5636.2	21.1	25	119	118	4	3	2.11	2	345	2	58	44	Rejected
Q257	1200.7	5665	28.8	142	11	9	35	3	2.99	181	16	19	-54	5
Q300	1219.3	5683.6	18.6	115	28	27	17	3	2.91	22	22	9	-27	14
Q301	1233.8	5698.1	14.5	5	39	35	-29	3	2.85	14	344	-15	84	18
Q302	1243.8	5708.1	10	315	30	21	-44	3	2.94	34	185	-25	48	11
Q303	1268.3	5732.6	24.5	327	34	34	-10	3	2.86	14	221	-5	55	17
Q304	1288.1	5752.4	19.8	132	22	22	14	3	2.94	34	29	7	-42	11
Q305	1309.5	5773.8	21.4	143	14	14	13	3	2.98	81	36	7	-52	7
Q306	1332	5796.3	22.5	159	20	18	26	3	2.96	47	34	14	-69	10
Q307	1353.5	5817.8	21.5	114	25	23	24	3	2.93	30	17	13	-27	12
Q308	1369.5	5833.8	16	339	20	19	-16	3	2.95	43	227	-8	67	10
Q309	1387.5	5851.8	18	335	51	39	-39	3	2.82	11	190	-22	67	20
Q310	1405.5	5869.8	18	344	27	24	-24	3	2.92	26	223	-12	74	13
Q311	1425.1	5889.4	19.6	12	29	11	-69	3	2.99	137	100	-52	55	6
Q312	1441.1	5905.4	16	171	32	21	49	3	2.94	36	327	30	-76	11
Q313	1461.9	5926.2	20.8	343	21	21	-5	3	2.94	36	244	-3	66	11
Q314	1478.9	5943.2	17	318	19	15	-36	3	2.97	69	193	-20	51	8
Q315	1496.2	5960.5	17.3	322	9	9	-9	3	2.99	185	218	-5	50	5
Q316	1516.3	5980.6	20.1	165	9	8	20	3	2.99	233	51	10	-73	4
Q317	1536.6	6000.9	20.3	348	7	5	-46	3	3	654	163	-28	76	3
Q318	1553.1	6017.4	16.5	153	14	13	21	3	2.98	88	35	11	-63	7
Q319	1572.2	6036.5	19.1	140	26	20	41	3	2.95	41	7	24	-53	10
Q320	1590.5	6054.8	18.3	172	11	8	45	3	2.99	236	333	27	-79	4
Q321	1610.7	6075	20.2	177	9	7	40	3	2.99	307	332	23	-85	4
Q322	1630.1	6094.4	19.4	357	55	51	-23	3	2.71	7	271	-12	83	25
Q323	1656.1	6120.4	26	279	246	138	-56	3	2	2	169	-36	18	47
Q324	1669.6	6133.9	13.5	121	9	7	42	3	2.99	336	5	25	-35	4
Q325	1688.7	6153	19.1	217	4	4	10	3	3	1090	186	5	-52	2
Q326	1708.2	6172.5	19.5	162	12	12	20	3	2.98	112	46	10	-71	6
Q327	1726.7	6191	18.5	163	7	7	18	3	2.99	307	50	9	-71	4
Q328	1745.2	6209.5	18.5	160	12	8	49	3	2.99	241	346	30	-69	4
Q329	1761.3	6225.6	16.1	166	43	40	21	3	2.81	11	50	11	-74	20
Q330	1779.3	6243.6	18	158	20	17	30	3	2.96	51	27	16	-69	9
Q331	1800.5	6264.8	21.2	339	5	5	-1	3	3	547	242	-1	62	3
Q332	1813.4	6277.7	12.9	153	12	12	13	3	2.98	115	44	7	-61	6
Q333	1832.4	6296.7	19	164	7	5	41	3	3	579	3	23	-74	3
Q334	1850.9	6315.2	18.5	115	43	27	50	3	2.91	21	357	31	-31	14
Q335	1873	6337.3	22.1	169	20	19	21	3	2.96	45	59	11	-77	10
Q336	1887.3	6351.6	14.3	91	20	18	28	3	2.96	49	9	15	-6	9
Q337	1905.3	6369.6	18	152	24	18	42	3	2.96	49	6	24	-64	9
Q338	1924.6	6388.9	19.3	151	13	10	39	3	2.99	143	11	22	-63	6
Q339	1941.1	6405.4	16.5	170	14	13	21	3	2.98	93	61	11	-77	7
Q340	1960.7	6425	19.6	171	17	14	32	3	2.97	78	31	17	-81	8
Q341	1994.7	6459	34	87	32	29	-23	3	2.89	19	32	-12	6	15
Q342	2015.8	6480.1	21.1	351	36	29	-36	3	2.9	20	192	-20	82	15
Q343	2030.8	6495.1	15	302	12	9	-41	3	2.99	190	186	-24	36	5
Q344	2042.8	6507.1	12	21	21	18	-32	3	2.96	47	20	-17	70	10
Q345	2060.1	6524.4	17.3	339	4	4	8	3	3	923	248	4	59	2
Q346	2076.6	6540.9	16.5	340	17	17	14	3	2.96	57	253	7	58	9
Q347	2095.4	6559.7	18.8	343	19	18	-21	3	2.96	50	226	-11	72	9
Q348	2112.8	6577.1	17.4	355	16	16	1	3	2.97	59	276	0	70	9
Q349	2131.9	6596.2	19.1	336	14	14	4	3	2.97	79	241	2	58	7
Q350	2152.7	6617	20.8	326	24	23	12	3	2.93	29	236	6	48	12
Q351	2169.2	6633.5	16.5	334	24	23	-13	3	2.93	29	225	-7	62	12
Q352	2187.3	6651.6	18.1	318	297	90	-72	3	1.78	2	140	-58	40	52
Q353	2210.4	6674.7	23.1	149	88	35	66	3	2.85	13	325	49	-51	18
Q354	2231.8	6696.1	21.4	115	67	36	58	3	2.84	13	348	38	-31	18
Q355	2248.3	6712.6	16.5	152	16	15	15	3	2.97	65	41	8	-61	8
Q356	2271.7	6736	23.4	172	16	15	25	3	2.97	71	57	13	-80	8
Q357	2285.8	6750.1	14.1	162	27	20	43	3	2.95	39	359	25	-73	11
Q358	2315.1	6779.4	29.3	159	29	26	26	3	2.92	24	33	14	-69	13
Q359	2328.6	6792.9	13.5	143	63	58	24	3	2.65	6	27	12	-54	28
Q360	2343.1	6807.4	14.5	331	38	37	-8	3	2.83	12	227	-4	58	19
Q361	2361.9	6826.2	18.8	355	39	34	-28	3	2.86	14	240	-15	84	18
Q362	2382.7	6847	20.8	330	28	22	-36	3	2.94	31	195	-20	62	12
Q363	2423.6	6887.9	40.9	161	16	16	13	3	2.97	60	54	7	-68	9
Q364	2432.2	6896.5	8.6	149	20	17	30	3	2.96	51	22	16	-60	9
Q370	2459.8	6924.1	27.6	158	13	12	22	3	2.98	113	39	11	-68	6
Q371	2483.8	6948.1	24	163	11	9	30	3	2.99	173	30	16	-74	5
Q372	2499.8	6964.1	16	162	17	14	38	3	2.98	82	11	21	-73	7
Q373	2515.8	6980.1	16	125	29	22	39	3	2.94	32	8	22	-39	12
Q374	2535	6999.3	19.2	152	32	25	39	3	2.92	26	11	22	-64	13
Q375	2553	7017.3	18	225	43	37	31	3	2.83	12	206	17	-47	19
Q376	2568.8	7033.1	15.8	309	95	90	-19	3	1.16	1	205	-10	40	63
Q377	2587.9	7052.2	19.1	314	40	28	-46	3	2.91	21	181	-28	47	14
Q378	2622.9	7087.2	35	332	27	27	-13	3	2.91	22	223	-6	60	14
Q379	2666.6	7130.9	43.7	339	10	9	-31	6	5.92	62	205	-17	70	9
Q380	2708.4	7172.7	41.8	328	36	30	-35	3	2.89	18	196	-19	60	16
Q381	2807.4	7271.7	99	330	10	10	-13	3	2.99	154	221	-7	58	5
Q382	2858.6	7322.9	51.2	331	5	5	-11	3	3	595	223	-6	59	3
Q383	2872.6	7336.9	14	295	311	90	-73	3	1.72	2	144	-59	29	53
Q384	2886.1	7350.4	13.5	189	104	86	-34	3	2.36	3	126	-19	-51	37	Rejected
Site	StratLev	StratLevR	StratDiff	Dec	Dec Err	a95	Inc	N	R	K	Plong	Plat	VGPLat	MAD
Rejected data
Rejected data: not statistically significant (R<2.62) and not supported by adjacent Class I site nor needed to fill a large stratigraphic gap.

## Sheet: Sheet2
	Samples (N)	Reversals (C)	Empirical spacing (reversals/sample)	Emprical probability	Observed duration (m.y.)	Model probability	Modelled spacing needed to achieve empirical probability	Model duration (m.y.)	sigma							10	0.47619
Chuquichambi I	166	24	0.150602	0.145455	9.2	0.145455	0.205128	12.2585	4.5287						0.15	20	0.487805
Chuquichambi II	115	27	0.243478	0.236842	7.5	0.236842	0.45	18.63	4.5393							0.19	0.137681

## Sheet: Chuquichambi I Temperature Step
Sample	Temp (°C)	Dec?	Incl?	Magnetic Intensity
Q-100A	400	26.1	139.4	0.000118
Q-100A	450	26.6	139.6	0.000113
Q-100A	500	27.6	139	9.68e-05
Q-100A	550	30.9	144.5	8.65e-05
Q-100A	600	28.3	141.7	8.06e-05
Q-100A	620	26.7	140.4	7.58e-05
Q-100A	640	26.2	140.4	7.03e-05
Q-100A	660	25.4	141.8	6.48e-05
Q-100A	680	3.4	141.9	6.92e-06
Q-100B	20	30.7	141.2	0.000103
Q-100B	400	33.1	144.4	0.000103
Q-100B	500	31.8	141.1	8.36e-05
Q-100B	550	33.1	140.8	8.48e-05
Q-100B	570	29.7	141.1	7.01e-05
Q-100B	600	31.6	142.4	6.66e-05
Q-100B	640	32.4	142.2	5.89e-05
Q-100B	650	33.3	142.3	5.78e-05
Q-100B	670	30.7	144.1	2.51e-05
Q-100B	680	12.5	146.5	1.15e-05
Q-100C	20	24.9	140.1	7.71e-05
Q-100C	400	25.7	142.4	7.83e-05
Q-100C	500	25.5	144.7	6.04e-05
Q-100C	550	26.8	146.9	6.12e-05
Q-100C	570	25.1	145.9	5.32e-05
Q-100C	600	26.6	145.9	5.01e-05
Q-100C	640	27.7	148	4.27e-05
Q-100C	650	26.4	147.6	4.27e-05
Q-100C	670	27.3	151.5	2.23e-05
Q-100C	680	23.6	148.8	7.73e-06
Q-101A	20	32.8	144.8	6.46e-05	20	1
Q-101A	200	31.9	147.4	6.61e-05	200	1.02
Q-101A	300	32	147.4	6.63e-05	300	1.03
Q-101A	400	32.8	149.6	6.73e-05	400	1.04
Q-101A	450	32.4	152.3	6.65e-05	450	1.03
Q-101A	500	33.3	150.9	6.65e-05	500	1.03
Q-101A	550	32	148.6	6.67e-05	550	1.03
Q-101A	600	34.1	148.3	4.8e-05	600	0.743
Q-101A	620	36.2	149	4.55e-05	620	0.704
Q-101A	640	31.2	143.7	4.61e-05	640	0.714
Q-101A	650	36.7	146.5	3.93e-05	650	0.608
Q-101A	670	35.4	159.3	2.69e-05	670	0.416
Q-101A	680	11.7	109	6.42e-06	680	0.0994
Q-101B	20	28.4	155.2	4.91e-05
Q-101B	400	25.8	162.4	4.87e-05
Q-101B	500	25.2	163.7	4.6e-05
Q-101B	550	27.8	161.6	4.19e-05
Q-101B	570	26.3	162.6	3.92e-05
Q-101B	600	24.4	168	4.03e-05
Q-101B	640	27.1	163.2	3.59e-05
Q-101B	650	27.1	166.2	3.14e-05
Q-101B	670	12.7	164.8	1.4e-05
Q-101B	680	-28.9	151.3	6.11e-06
Q-101C	20	21.4	142.9	6.08e-05	20	0.727
Q-101C	400	22.5	153.2	5.53e-05
Q-101C	500	22.6	151.6	5.18e-05
Q-101C	550	24.2	150.9	4.42e-05
Q-101C	570	23.6	154.6	4.15e-05
Q-101C	600	21	159	4.34e-05
Q-101C	640	24.3	154	3.8e-05
Q-101C	650	23.7	155.3	3.62e-05
Q-101C	670	13.5	158.3	1.89e-05
Q-101C	680	0.1	199.5	6.23e-06
Q-102A	20	67.9	125	2.51e-05	20	0.555
Q-102A	200	59.4	145.2	2.57e-05	200	0.569
Q-102A	300	54.7	147.9	2.63e-05	300	0.582
Q-102A	400	45	143.9	2.96e-05	400	0.655
Q-102A	450	44.8	147.3	2.93e-05	450	0.648
Q-102A	500	42.9	151.3	2.95e-05	500	0.653
Q-102A	550	40.4	148.2	3.1e-05	550	0.686
Q-102A	600	33.4	155.6	2.65e-05	600	0.586
Q-102A	620	33.9	153.5	2.49e-05	620	0.551
Q-102A	640	30.3	155.1	2.56e-05	640	0.566
Q-102A	650	34.5	149.9	2.17e-05	650	0.48
Q-102A	670	32.8	155.2	1.69e-05	670	0.374
Q-102A	680	21.3	129	6.01e-06	680	0.133
Q-102B	20	60.7	140.6	2.03e-05
Q-102B	400	37.7	154.6	2.16e-05
Q-102B	500	30.6	160.9	2.09e-05
Q-102B	550	30.8	160.6	1.89e-05
Q-102B	570	32.1	160.7	1.79e-05
Q-102B	600	28.3	167.9	1.78e-05
Q-102B	640	28.6	158.2	1.62e-05
Q-102B	650	32.4	155.4	1.51e-05
Q-102B	670	17.8	156.8	1.08e-05
Q-102B	680	21.9	167.1	5.16e-06
Q-102C	20	60.8	119.6	1.7e-05
Q-102C	400	44.8	155.7	1.64e-05
Q-102C	500	44.5	154.1	1.6e-05
Q-102C	550	46.6	161.7	1.21e-05
Q-102C	570	46.9	157.3	1.32e-05
Q-102C	600	43.2	159.3	1.32e-05
Q-102C	640	40.2	163.1	1.11e-05
Q-102C	650	39.4	166	1.1e-05
Q-102C	670	33.8	168.7	7.1e-06
Q-102C	680	31.9	194.5	4.24e-06
Q-103A	20	41.4	158.6	4.87e-05	20	1
Q-103A	200	37.8	164.5	4.82e-05	200	0.99
Q-103A	300	39	167.9	4.8e-05	300	0.986
Q-103A	400	37.6	169.1	4.83e-05	400	0.992
Q-103A	450	39	169.1	4.87e-05	450	1
Q-103A	500	38.1	171.2	4.71e-05	500	0.967
Q-103A	550	37.6	170.5	4.52e-05	550	0.928
Q-103A	600	36.4	171.2	3.85e-05	600	0.791
Q-103A	620	40.2	169.7	3.69e-05	620	0.758
Q-103A	640	36.1	177.6	3.39e-05	640	0.696
Q-103A	650	39.6	171	3.55e-05	650	0.729
Q-103A	670	39.9	177.2	2.76e-05	670	0.567
Q-103A	680	20	160.9	7.29e-06	680	0.15
Q-103B	20	28.5	291.5	4.18e-05
Q-103B	400	38.7	238.3	2.76e-05
Q-103B	500	40	222	2.47e-05
Q-103B	550	42.5	225.8	2.21e-05
Q-103B	570	39.9	226.5	2.05e-05
Q-103B	600	41.6	221.5	2.06e-05
Q-103B	640	37.4	200.5	1.97e-05
Q-103B	650	37.8	194	2.13e-05
Q-103B	670	37.5	194.2	1.25e-05
Q-103B	680	21.5	206.1	5.16e-06
Q-103C	20	38.7	153	3.55e-05
Q-103C	400	41.1	171.8	3.03e-05
Q-103C	500	40.1	175.8	2.69e-05
Q-103C	550	49	177.4	2.2e-05
Q-103C	570	43.7	180.1	2.07e-05
Q-103C	600	42	180.3	2.1e-05
Q-103C	640	42	189.8	1.76e-05
Q-103C	650	37.7	182.2	2.09e-05
Q-103C	670	32.3	178.7	1.57e-05
Q-103C	680	30	197	5.98e-06
Q-104A	20	-14.6	349.4	0.00013	20	1
Q-104A	200	-13.7	350.9	0.000124	200	0.954
Q-104A	300	-17	350.8	0.000122	300	0.938
Q-104A	400	-18.2	351.3	0.000119	400	0.915
Q-104A	450	-18.8	351.7	0.000118	450	0.908
Q-104A	500	-22.9	351	0.000111	500	0.854
Q-104A	550	-22.5	351.6	0.000104	550	0.8
Q-104A	600	-24.5	353.2	8.63e-05	600	0.664
Q-104A	620	-22.3	352.8	8.13e-05	620	0.625
Q-104A	640	-27.3	350.4	7.94e-05	640	0.611
Q-104A	650	-23.2	353.2	7.3e-05	650	0.562
Q-104A	670	-19.3	353.9	5.8e-05	670	0.446
Q-104A	680	-20.3	358	1.27e-05	680	0.0977
Q-104B	20	-20.8	341.1	0.00011
Q-104B	400	-34.5	345.7	8.24e-05
Q-104B	500	-31.6	341.5	8.12e-05
Q-104B	550	-36.8	348.1	6.48e-05
Q-104B	570	55.7	241.1	6.81e-05
Q-104B	600	-29.3	346.3	6.18e-05
Q-104B	640	-31.8	345.2	5.57e-05
Q-104B	650	-31.2	344	6.03e-05
Q-104B	670	-31.3	343.2	4.6e-05
Q-104B	680	-29.3	342	1.23e-05
Q-104C	20	-17.6	351.4	0.000156
Q-104C	400	-23.9	353.4	0.000131
Q-104C	500	-22.4	352.9	0.000122
Q-104C	550	-28.1	358.4	0.000101
Q-104C	570	-27.5	359.7	8.83e-05
Q-104C	600	-25.7	356.7	8.93e-05
Q-104C	640	-27.5	355.5	8.49e-05
Q-104C	650	-25.8	353.6	8.87e-05
Q-104C	670	-25.1	352.9	6.7e-05
Q-104C	680	-27.4	354.5	2.2e-05
Q-105A	20	15.4	318.6	1.98e-05	20	1
Q-105A	200	11.7	307.8	1.74e-05	200	0.879
Q-105A	300	8.8	299.6	1.79e-05	300	0.904
Q-105A	400	-0.2	283.2	1.89e-05	400	0.955
Q-105A	450	15.6	293.3	1.91e-05	450	0.965
Q-105A	500	12.9	286.9	1.86e-05	500	0.939
Q-105A	550	10.1	286.8	1.47e-05	550	0.742
Q-105A	600	2.6	284.2	1.06e-05	600	0.535
Q-105A	620	7	286.1	1.03e-05	620	0.52
Q-105A	640	-13.6	274.2	1.11e-05	640	0.561
Q-105A	650	5.8	282.6	9.59e-06	650	0.484
Q-105A	670	8.5	282	8.12e-06	670	0.41
Q-105A	680	12.7	301.2	2.05e-06	680	0.104
Q-105B	20	-3.4	322.5	2.53e-05
Q-105B	400	-26.8	305.3	1.6e-05
Q-105B	500	-29.3	305.4	1.37e-05
Q-105B	550	-42.4	296.6	1.12e-05
Q-105B	570	-45.5	295.2	1.07e-05
Q-105B	600	-38.8	295.8	1.17e-05
Q-105B	640	-41	298.7	9.91e-06
Q-105B	650	-50.6	290	9.86e-06
Q-105B	670	-48	283.8	9.29e-06
Q-105B	680	-53.4	291.3	1.4e-06
Q-105C	20	11	330.1	2.42e-05
Q-105C	400	5.2	327.8	1.73e-05
Q-105C	500	0.7	324.2	1.55e-05
Q-105C	550	-8.4	321.3	1.15e-05
Q-105C	570	-7.3	324.2	1.07e-05
Q-105C	600	0.7	324.4	1.11e-05
Q-105C	640	-1.6	317.7	1.02e-05
Q-105C	650	-5.3	323.9	1.07e-05
Q-105C	670	1.4	322.4	9.45e-06
Q-105C	680	-4.9	313.3	4.29e-06
Q-106A	20	1.8	314.5	3.13e-05	20	1
Q-106A	200	-2.7	314	2.87e-05	200	0.917
Q-106A	300	-12.6	311.5	2.87e-05	300	0.917
Q-106A	400	-8.3	310.3	2.76e-05	400	0.882
Q-106A	450	-6.7	312	2.53e-05	450	0.808
Q-106A	500	-7.1	310.5	2.35e-05	500	0.751
Q-106A	550	-9	312.7	2.01e-05	550	0.642
Q-106A	600	-4.1	307.4	1.61e-05	600	0.514
Q-106A	620	0.8	303.9	1.57e-05	620	0.502
Q-106A	640	-12.3	309.3	1.7e-05	640	0.543
Q-106A	650	-10.7	306.1	1.41e-05	650	0.45
Q-106A	670	-10	315.2	1.14e-05	670	0.364
Q-106A	680	-15	285.9	2.22e-06	680	0.0709
Q-106B	20	5	321.4	3.17e-05
Q-106B	400	10.1	315.6	2.36e-05
Q-106B	500	8.6	313.5	2.09e-05
Q-106B	550	3.1	309	1.88e-05
Q-106B	570	6.5	310.3	1.68e-05
Q-106B	600	18.4	316.2	1.64e-05
Q-106B	640	16	310.4	1.57e-05
Q-106B	650	8.1	306.6	1.65e-05
Q-106B	670	11.7	310.6	1.32e-05
Q-106B	680	17.9	300.3	6.99e-06
Q-106C	20	-12.8	311.5	2.48e-05
Q-106C	400	-8.2	309	2.17e-05
Q-106C	500	-8.8	306.1	2.04e-05
Q-106C	550	-17.5	305.1	1.69e-05
Q-106C	570	-18.8	303.7	1.73e-05
Q-106C	600	-7.7	309.7	1.66e-05
Q-106C	640	-7	311	1.33e-05
Q-106C	650	-9.8	309.8	1.7e-05
Q-106C	670	-1.2	313.5	1.42e-05
Q-106C	680	-10.7	330.7	5.1e-06
Q-107A	20	-48.2	337.7	5.22e-05	20	1
Q-107A	200	-39.8	332.8	5.32e-05	200	1.02
Q-107A	300	-39.5	331.5	5.33e-05	300	1.02
Q-107A	400	-42.1	328.9	5.04e-05	400	0.966
Q-107A	450	-38.9	328.4	4.78e-05	450	0.916
Q-107A	500	-41	329.1	4.23e-05	500	0.81
Q-107A	550	-40	330.3	3.93e-05	550	0.753
Q-107A	600	-40.3	328.7	3.32e-05	600	0.636
Q-107A	620	-47	333.2	3.27e-05	620	0.626
Q-107A	640	-44.9	331.9	3.15e-05	640	0.603
Q-107A	650	-47	334.1	3.02e-05	650	0.579
Q-107A	670	-46.6	324.1	1.94e-05	670	0.372
Q-107A	680	-50.8	350.4	8.55e-06	680	0.164
Q-107B	20	-43.2	340.9	4.67e-05
Q-107B	400	-44.1	336.1	3.26e-05
Q-107B	500	-37.8	331.2	2.77e-05
Q-107B	550	-51.7	340	2.02e-05
Q-107B	570	-46.3	335.2	1.92e-05
Q-107B	600	-40.9	330.1	1.85e-05
Q-107B	640	-43.9	332.6	1.65e-05
Q-107B	650	-43	333.1	1.83e-05
Q-107B	670	-43.1	334.5	1.53e-05
Q-107B	680	-36.7	327.5	6.69e-06
Q-107C	20	-1.4	316.8	0.000238
Q-107C	400	-0.9	321.6	9.44e-05
Q-107C	500	1	323.2	6.44e-05
Q-107C	550	-13.3	322.9	3.96e-05
Q-107C	570	-15.8	326.4	3.6e-05
Q-107C	600	-9.9	327.5	3.3e-05
Q-107C	640	-12.1	328.3	2.72e-05
Q-107C	650	-11.3	328.3	2.94e-05
Q-107C	670	-13	330.5	1.97e-05
Q-107C	680	-18.9	326.2	1.01e-05
Q-108A	20	-30.5	330.3	4.78e-05	20	1
Q-108A	200	-36.1	332	4.76e-05	200	0.996
Q-108A	300	-37.5	329.7	4.78e-05	300	1
Q-108A	400	-39.3	329.9	4.54e-05	400	0.95
Q-108A	450	-41	330.1	4.36e-05	450	0.912
Q-108A	500	-40	325	3.64e-05	500	0.762
Q-108A	550	-42.5	328.2	3.47e-05	550	0.726
Q-108A	600	-41.1	323.2	3.02e-05	600	0.632
Q-108A	620	-42.1	329.6	2.75e-05	620	0.575
Q-108A	640	-51.8	333.3	2.76e-05	640	0.577
Q-108A	650	-45.1	328.3	2.45e-05	650	0.513
Q-108A	670	-43.2	330.2	1.45e-05	670	0.303
Q-108A	680	-46.3	308.3	6.44e-06	680	0.135
Q-108B	20	-27.3	342.7	3.62e-05
Q-108B	400	-37.9	332.4	3.14e-05
Q-108B	500	-42	329.7	2.72e-05
Q-108B	550	-49	337.3	2.16e-05
Q-108B	570	-49.6	334.8	2.06e-05
Q-108B	600	-42.4	326.5	2.03e-05
Q-108B	640	-40.2	332.1	1.75e-05
Q-108B	650	-39.6	325.8	2.04e-05
Q-108B	670	-45.8	334.7	1.46e-05
Q-108B	680	-36.5	336.2	9.07e-06
Q-108C	20	-37.4	336	3.78e-05
Q-108C	400	-47.6	330.5	3.37e-05
Q-108C	500	-51.2	333.2	3.02e-05
Q-108C	550	-59	336.2	2.52e-05
Q-108C	570	-57.5	336.5	2.45e-05
Q-108C	600	-56.8	335.1	2.31e-05
Q-108C	640	-56	328	1.96e-05
Q-108C	650	-50.9	324	2.06e-05
Q-108C	670	-57.3	326	1.43e-05
Q-108C	680	-50.1	313.4	9.83e-06
Q-109A	20	-38.1	319	0.000103	20	1
Q-109A	200	-37.8	316.5	0.0001	200	0.971
Q-109A	300	-37.7	313.9	9.99e-05	300	0.97
Q-109A	400	-39.6	314	9.66e-05	400	0.938
Q-109A	450	-37.9	312	9.22e-05	450	0.895
Q-109A	500	-38.9	314.3	7.8e-05	500	0.757
Q-109A	550	-40.2	314.2	6.96e-05	550	0.676
Q-109A	600	-39.8	318.6	6.3e-05	600	0.612
Q-109A	620	-41.4	318.7	6.04e-05	620	0.586
Q-109A	640	-42.6	318.3	5.78e-05	640	0.561
Q-109A	650	-42.6	320	5.55e-05	650	0.539
Q-109A	670	-41.4	315.1	3.82e-05	670	0.371
Q-109A	680	-45.8	315	1.88e-05	680	0.183
Q-109B	20	-42.8	322.7	0.000121
Q-109B	400	-43.3	322	0.00011
Q-109B	500	-45.4	321.1	8.79e-05
Q-109B	550	-49.9	334.9	7.41e-05
Q-109B	570	-50.8	333	7.04e-05
Q-109B	600	-48.7	324.3	6.38e-05
Q-109B	640	-47.3	321.1	5.92e-05
Q-109B	650	-46.5	320.4	5.86e-05
Q-109B	670	-42.8	304.7	2.56e-05
Q-109B	680	20.5	6.8	4.91e-06
Q-109C	20	-36.5	330.6	9.05e-05
Q-109C	400	-45.2	328.8	7.76e-05
Q-109C	500	-46.6	331	6.48e-05
Q-109C	550	-28.9	330	8.08e-05
Q-109C	570	-47.4	337.9	5.87e-05
Q-109C	600	-46.6	329.5	5.38e-05
Q-109C	640	-44.7	325.9	4.78e-05
Q-109C	650	-42.5	330.1	4.55e-05
Q-109C	670	-44.4	320.8	2.31e-05
Q-109C	680	-50.5	10.9	5.53e-06
Q-110A	20	12.8	275	0.000153	20	1
Q-110A	200	13.1	274.8	0.000156	200	1.02
Q-110A	300	13.2	269.9	0.000158	300	1.03
Q-110A	400	13.2	263.2	0.000156	400	1.02
Q-110A	450	14.2	268.8	0.000149	450	0.974
Q-110A	500	16.1	269.8	0.000126	500	0.824
Q-110A	550	16.9	270.5	0.000115	550	0.752
Q-110A	600	16.2	268	0.000105	600	0.686
Q-110A	620	15.8	268.1	0.000103	620	0.673
Q-110A	640	14.9	264.9	0.0001	640	0.654
Q-110A	650	16.1	272.8	9.43e-05	650	0.616
Q-110A	670	18	275.8	6.22e-05	670	0.407
Q-110A	680	19.8	278.6	3.69e-05	680	0.241
Q-110B	20	-18.4	307.5	8.61e-05
Q-110B	400	-18.1	306	8.07e-05
Q-110B	500	-16.5	308.5	6.71e-05
Q-110B	550	-20.8	303.5	4.6e-05
Q-110B	570	-21.3	315.1	5.76e-05
Q-110B	600	-16.3	307.7	4.84e-05
Q-110B	640	-17.1	307.4	4.73e-05
Q-110B	650	-17.5	308.8	4.98e-05
Q-110B	670	-18.3	309.3	2.95e-05
Q-110B	680	-43.4	296.9	4.67e-06
Q-110C	20	-20.2	318.9	0.000102
Q-110C	400	-20.8	314.9	9.14e-05
Q-110C	500	-20.8	315.6	7.96e-05
Q-110C	550	-27.1	308.2	5.5e-05
Q-110C	570	-15.2	308.2	4.97e-05
Q-110C	600	-18.5	315	5.6e-05
Q-110C	640	-22.7	311.7	5.31e-05
Q-110C	650	-19.2	314	5.41e-05
Q-110C	670	-14.6	317.1	3.47e-05
Q-110C	680	-29.2	297.3	1.08e-05
Q-111A	20	-35.5	321.6	9.68e-05	20	1
Q-111A	200	-37.6	319	9.99e-05	200	1.03
Q-111A	300	-36.4	318.6	0.000101	300	1.04
Q-111A	400	-42.5	323.2	0.000101	400	1.04
Q-111A	450	-36.8	316.6	9.9e-05	450	1.02
Q-111A	500	-36.9	314.8	8.55e-05	500	0.883
Q-111A	550	-36.5	315.2	7.73e-05	550	0.799
Q-111A	600	-35.3	313.9	7.28e-05	600	0.752
Q-111A	620	-37.5	314.2	7.12e-05	620	0.736
Q-111A	640	-39.2	315.2	6.86e-05	640	0.709
Q-111A	650	-35.6	313.8	6.64e-05	650	0.686
Q-111A	670	-39.8	312.9	3.95e-05	670	0.408
Q-111A	680	-45.3	315.1	2.53e-05	680	0.261
Q-111B	20	-38.2	333.6	8.25e-05
Q-111B	400	-42.4	332.1	7.45e-05
Q-111B	500	-45.1	331.2	5.97e-05
Q-111B	550	-52.2	339.7	4.3e-05
Q-111B	570	-44.6	332.9	4.33e-05
Q-111B	600	-45.6	335.2	4.34e-05
Q-111B	640	-45.4	331.8	4.14e-05
Q-111B	650	-43.9	330.7	4.38e-05
Q-111B	670	-43.5	331	3.01e-05
Q-111B	680	-52.1	347.6	7.66e-06
Q-111C	20	-31.5	325.9	0.00012
Q-111C	400	-32.3	324	0.000102
Q-111C	500	-34	322.4	8.9e-05
Q-111C	550	-43.1	325.9	5.89e-05
Q-111C	570	-34.2	321.4	7.96e-05
Q-111C	600	-35.4	324.3	6.17e-05
Q-111C	640	-39.7	324.4	5.94e-05
Q-111C	650	-34.4	320.9	6.64e-05
Q-111C	670	-31	320.9	4.55e-05
Q-111C	680	-27.2	314.1	1.53e-05
Q-112A	20	-10.6	321.4	6.39e-05	20	1
Q-112A	200	-11.3	322.7	5.91e-05	200	0.925
Q-112A	300	-13.8	324.3	5.87e-05	300	0.919
Q-112A	400	-15.9	326.8	5.6e-05	400	0.876
Q-112A	450	-9.7	323.5	4.98e-05	450	0.779
Q-112A	500	-12.3	322.9	4.24e-05	500	0.664
Q-112A	550	-12.2	324.9	4.11e-05	550	0.643
Q-112A	600	-11.7	323.2	3.92e-05	600	0.613
Q-112A	620	-11.8	324.5	3.69e-05	620	0.577
Q-112A	640	-11.8	322.5	3.52e-05	640	0.551
Q-112A	650	-11.7	324.3	3.29e-05	650	0.515
Q-112A	670	-7.6	317.7	1.42e-05	670	0.222
Q-112A	680	-11.2	332.4	8.33e-06	680	0.13
Q-112B	20	-3.5	347.7	3.85e-05
Q-112B	400	-7.5	340.5	3.53e-05
Q-112B	500	-10.5	346.5	2.2e-05
Q-112B	550	-16.2	352.7	1.48e-05
Q-112B	570	-10.9	345.1	1.83e-05
Q-112B	600	-9.3	351.6	1.44e-05
Q-112B	640	-14.1	346.2	1.25e-05
Q-112B	650	-14.7	340.8	1.4e-05
Q-112B	670	-14.7	337.6	9.96e-06
Q-112B	680	13.2	318	3.83e-06
Q-112C	20	-12	348.3	4.67e-05
Q-112C	400	-12.3	336.6	4.99e-05
Q-112C	500	-17.8	339.7	3.22e-05
Q-112C	550	-25	347.6	2.45e-05
Q-112C	570	-18.8	340.6	2.79e-05
Q-112C	600	-19.1	345.9	2.34e-05
Q-112C	640	-23.1	338.9	2.13e-05
Q-112C	650	-22.2	339	2.23e-05
Q-112C	670	-19	335.1	1.63e-05
Q-112C	680	-19.7	335.2	4.95e-06
Q-113A	20	-28.1	9.6	4.62e-05	20	1
Q-113A	200	-33.9	13.3	4.57e-05	200	0.989
Q-113A	300	-35.5	16.4	4.59e-05	300	0.994
Q-113A	400	-29.3	28.4	4.61e-05	400	0.998
Q-113A	450	-36.3	23.1	4.32e-05	450	0.935
Q-113A	500	-35.8	21.3	3.59e-05	500	0.777
Q-113A	550	-40	20.6	3.34e-05	550	0.723
Q-113A	600	-38	25.2	3.16e-05	600	0.684
Q-113A	620	-39.6	17.3	2.85e-05	620	0.617
Q-113A	640	-35.7	21.5	2.61e-05	640	0.565
Q-113A	650	-43.1	20.1	2.69e-05	650	0.582
Q-113A	670	-49.3	16.9	1.13e-05	670	0.245
Q-113A	680	-54	43.3	8.59e-06	680	0.186
Q-113B	20	-32.9	26	3.56e-05
Q-113B	400	-48.3	22.9	3.2e-05
Q-113B	500	-51.5	34	2.47e-05
Q-113B	550	-48.7	45.2	2.03e-05
Q-113B	570	-52	34.4	2.19e-05
Q-113B	600	-50.2	38.2	1.97e-05
Q-113B	640	-55.8	37.8	1.84e-05
Q-113B	650	-54.5	35.3	1.95e-05
Q-113B	670	-54.2	40.9	1.41e-05
Q-113B	680	-53.9	60.3	6.59e-06
Q-113C	20	-37.1	32.6	3.15e-05
Q-113C	400	-47.6	33.1	3e-05
Q-113C	500	-46.6	37	2.23e-05
Q-113C	550	-49.8	43.5	1.66e-05
Q-113C	570	-55.3	36.1	1.85e-05
Q-113C	600	-53.1	50.1	1.56e-05
Q-113C	640	-50.9	47.4	1.43e-05
Q-113C	650	-51.3	46.8	1.39e-05
Q-113C	670	-52.3	60.9	1.19e-05
Q-113C	680	-62.4	23.5	5.93e-06
Q-114A	20	-21.6	347.2	5.79e-05	20	1
Q-114A	200	-23.1	345.2	5.66e-05	200	0.978
Q-114A	300	-24.4	343.5	5.59e-05	300	0.965
Q-114A	400	-22.5	344.9	5.56e-05	400	0.96
Q-114A	450	-26.5	343.1	4.85e-05	450	0.838
Q-114A	500	-26.4	341.2	4.06e-05	500	0.701
Q-114A	550	-27	344.6	3.84e-05	550	0.663
Q-114A	600	-24.7	341.6	3.68e-05	600	0.636
Q-114A	620	-27	345.7	3.59e-05	620	0.62
Q-114A	640	-22.2	344.1	3.2e-05	640	0.553
Q-114A	650	-27.7	343.4	3.19e-05	650	0.551
Q-114A	670	-16.3	351.6	1.15e-05	670	0.199
Q-114A	680	-48	236	4.83e-06	680	0.0834
Q-114B	20	-28.5	5.9	4.43e-05
Q-114B	400	-31.7	356	4e-05
Q-114B	500	-32.2	1.7	2.99e-05
Q-114B	550	-33.7	5.2	2.3e-05
Q-114B	570	-31.4	2.8	2.47e-05
Q-114B	600	-31	5.6	2.19e-05
Q-114B	640	-35.2	5.5	1.84e-05
Q-114B	650	-32.3	0.3	1.83e-05
Q-114B	670	-35.2	351.8	1.36e-05
Q-114B	680	-50	359.2	4.71e-06
Q-114C	20	-27	357.6	3.91e-05
Q-114C	400	-27.3	349.1	3.59e-05
Q-114C	500	-24.8	350.9	2.62e-05
Q-114C	550	-24.6	352.8	1.99e-05
Q-114C	570	-23.7	349	2.26e-05
Q-114C	600	-24.9	357	1.82e-05
Q-114C	640	-24.7	349	1.83e-05
Q-114C	650	-27	348.5	1.82e-05
Q-114C	670	-27.8	349.7	1.25e-05
Q-114C	680	-13.8	335.2	5.82e-06
Q-115A	20	-15.5	336	4.99e-05	20	1
Q-115A	200	-20.8	336.1	4.75e-05	200	0.952
Q-115A	300	-23.2	336	4.78e-05	300	0.958
Q-115A	400	-23.9	337	4.79e-05	400	0.96
Q-115A	450	-26.5	334.1	4.18e-05	450	0.838
Q-115A	500	-24.2	330.2	3.87e-05	500	0.776
Q-115A	550	-25	332.7	3.49e-05	550	0.699
Q-115A	600	-25.6	330.9	3.17e-05	600	0.635
Q-115A	620	-27.4	333.4	2.97e-05	620	0.595
Q-115A	640	-28.5	328.2	2.86e-05	640	0.573
Q-115A	650	-28.7	329.1	2.76e-05	650	0.553
Q-115A	670	-26.9	1.8	7.68e-06	670	0.154
Q-115A	680	-39.5	249.4	4.73e-06	680	0.0948
Q-115B	20	-22.9	337.4	7.96e-05
Q-115B	400	-33.7	341.9	3.62e-05
Q-115B	500	-38.1	347.4	2.61e-05
Q-115B	550	-44	353.7	1.98e-05
Q-115B	570	-39.1	341	2.28e-05
Q-115B	600	-40.4	350.2	1.93e-05
Q-115B	640	-40.2	345.5	1.93e-05
Q-115B	650	-41	344.2	1.93e-05
Q-115B	670	-40.5	339.1	1.53e-05
Q-115B	680	-52	329	6.99e-06
Q-115C	20	-19.8	345.1	3.76e-05
Q-115C	400	-27.6	346	3.39e-05
Q-115C	500	-29.7	354	2.49e-05
Q-115C	550	-36.4	2.6	1.81e-05
Q-115C	570	-33.9	358.5	2.02e-05
Q-115C	600	-35.1	3	1.73e-05
Q-115C	640	-35.4	350.8	1.7e-05
Q-115C	650	-36.1	350.7	1.72e-05
Q-115C	670	-36.6	350.2	1.45e-05
Q-115C	680	-30.8	349.3	6.98e-06
Q-116A	20	22.9	117	3.25e-05	20	1
Q-116A	200	16.7	127	3.53e-05	200	1.09
Q-116A	300	6.3	131.3	3.61e-05	300	1.11
Q-116A	400	20.1	132.2	3.64e-05	400	1.12
Q-116A	450	9.6	133.2	3.57e-05	450	1.1
Q-116A	500	8.8	136.1	3.12e-05	500	0.96
Q-116A	550	3.4	137.5	3.09e-05	550	0.951
Q-116A	600	2.9	137.8	2.89e-05	600	0.889
Q-116A	620	1.1	138.3	2.86e-05	620	0.88
Q-116A	640	6.6	140.4	2.52e-05	640	0.775
Q-116A	650	-0.2	134.8	2.65e-05	650	0.815
Q-116A	670	9.6	137.8	2.11e-05	670	0.649
Q-116A	680	-33	210.2	3.56e-06	680	0.11
Q-116B	20	37.5	143.3	2.38e-05
Q-116B	400	16.3	142.1	3.08e-05
Q-116B	500	16.7	140.4	2.6e-05
Q-116B	550	19.5	146.3	1.79e-05
Q-116B	570	15.6	138.3	2.76e-05
Q-116B	600	14.5	139.6	2.38e-05
Q-116B	640	13.4	139	2.44e-05
Q-116B	650	14.8	140.7	2.5e-05
Q-116B	670	11.9	143	2.54e-05
Q-116B	680	14.7	140.5	1.53e-05
Q-116C	20	15.7	159	3.57e-05
Q-116C	400	16.5	138.4	6e-05
Q-116C	500	17.2	138.1	5.38e-05
Q-116C	550	30.1	142.2	3.91e-05
Q-116C	570	16.4	139.7	4.89e-05
Q-116C	600	16.6	140.2	4.22e-05
Q-116C	640	14.7	141.3	4.39e-05
Q-116C	650	14	139.9	4.45e-05
Q-116C	670	16.1	140	3.23e-05
Q-116C	680	15.1	137.1	2.46e-05
Q-117A	20	39.8	155.5	4.86e-05	20	1
Q-117A	200	41.6	155.7	5.12e-05	200	1.05
Q-117A	300	42.2	152.2	5.57e-05	300	1.15
Q-117A	400	42.1	156.6	5.6e-05	400	1.15
Q-117A	450	42.7	155	5.76e-05	450	1.19
Q-117A	500	42.9	154.5	5.2e-05	500	1.07
Q-117A	550	42	152.8	4.97e-05	550	1.02
Q-117A	600	41	153.6	4.19e-05	600	0.862
Q-117A	620	40.8	152.5	4.05e-05	620	0.833
Q-117A	640	39.3	164.9	3.87e-05	640	0.796
Q-117A	650	46	150.4	3.58e-05	650	0.737
Q-117A	670	45.2	157.4	2.97e-05	670	0.611
Q-117A	680	30.3	174.2	8.31e-06	680	0.171
Q-117B	20	56.4	153.1	5.06e-05
Q-117B	400	56.4	157.2	4.88e-05
Q-117B	500	53.6	158.5	4.15e-05
Q-117B	550	58.1	175.7	3.25e-05
Q-117B	570	56.8	158.1	3.59e-05
Q-117B	600	58.2	165.4	3.25e-05
Q-117B	640	57.5	160.7	3.06e-05
Q-117B	650	57.6	153.9	2.93e-05
Q-117B	670	-20.9	135.3	4.57e-06
Q-117B	680	12.2	205.9	4e-06
Q-117C	20	54.5	146.4	4e-05
Q-117C	400	49.6	146.7	4.09e-05
Q-117C	500	48	153.8	3.43e-05
Q-117C	550	50.3	169.3	2.66e-05
Q-117C	570	49.5	156.7	3.08e-05
Q-117C	600	49.3	155.5	2.56e-05
Q-117C	640	49.6	150.3	2.74e-05
Q-117C	650	46.7	150.6	2.54e-05
Q-117C	670	8.6	142.2	6.99e-06
Q-117C	680	35.8	161.4	2.02e-06
Q-118A	20	67.4	152.9	2.14e-05	20	1
Q-118A	200	58	147.1	2.01e-05	200	0.939
Q-118A	300	54.4	146.4	2.03e-05	300	0.949
Q-118A	400	53.2	171.1	2.02e-05	400	0.944
Q-118A	450	49.9	144.6	2.14e-05	450	1
Q-118A	500	49.3	153.5	1.97e-05	500	0.921
Q-118A	550	47.8	146.3	1.74e-05	550	0.813
Q-118A	600	52.4	155.6	1.48e-05	600	0.692
Q-118A	620	54.4	158.5	1.39e-05	620	0.65
Q-118A	640	43.2	192.2	1.12e-05	640	0.523
Q-118A	650	61.6	150.4	1.09e-05	650	0.509
Q-118A	670	62.5	151.6	9.6e-06	670	0.449
Q-118A	680	14.7	235	3.19e-06	680	0.149
Q-118B	20	77.4	73.6	2.49e-05
Q-118B	400	70.1	108.4	2.3e-05
Q-118B	500	67.5	111.8	1.72e-05
Q-118B	550	71	112	1.34e-05
Q-118B	570	65	104.3	1.46e-05
Q-118B	600	65.1	109.9	1.39e-05
Q-118B	640	72.6	131.2	1.33e-05
Q-118B	650	71.4	118.6	1.51e-05
Q-118B	670	74.8	202.8	6.04e-06
Q-118B	680	52.7	201.9	1.92e-06
Q-118C	20	79.9	77.3	1.67e-05
Q-118C	400	68.5	118.7	1.59e-05
Q-118C	500	63.3	140	1.24e-05
Q-118C	550	69.4	170.1	1e-05
Q-118C	570	68.2	142.7	1.07e-05
Q-118C	600	70.5	141.6	1.02e-05
Q-118C	640	63.9	145.9	9.75e-06
Q-118C	650	64.5	159.2	1.22e-05
Q-118C	670	39.9	190.6	3.25e-06
Q-118C	680	56.6	207.1	5.53e-06
Q-119A	20	19.1	143.9	0.000175	20	1
Q-119A	200	18.8	146.2	0.000177	200	1.01
Q-119A	300	17.7	148	0.000182	300	1.04
Q-119A	400	19.6	148.6	0.000184	400	1.05
Q-119A	450	18.9	148.6	0.000184	450	1.05
Q-119A	500	18.9	149.5	0.000178	500	1.02
Q-119A	550	18.4	149.3	0.000176	550	1.01
Q-119A	600	19	151.1	0.00013	600	0.743
Q-119A	620	18.4	149.5	0.000126	620	0.72
Q-119A	640	22	149.3	0.000122	640	0.697
Q-119A	650	19.8	149.3	0.000118	650	0.674
Q-119A	670	19.2	152.5	9.25e-05	670	0.529
Q-119A	680	11.2	159.5	2.19e-05	680	0.125
Q-119B	20	13	148.3	8.6e-05
Q-119B	400	14.7	152	8.61e-05
Q-119B	500	16.5	151.9	7.59e-05
Q-119B	550	29.6	149.8	5.42e-05
Q-119B	570	19	153.5	5.82e-05
Q-119B	600	17.8	152.6	5.4e-05
Q-119B	640	16.5	152.4	6.16e-05
Q-119B	650	17.1	148.8	6.01e-05
Q-119B	670	11.7	157	3.28e-05
Q-119B	680	21.8	171.6	8.3e-06
Q-119C	20	29	141.3	0.000151
Q-119C	400	25.4	144.4	0.000146
Q-119C	500	24.1	143.7	0.000131
Q-119C	550	37	145.3	8.92e-05
Q-119C	570	27	146.1	9.81e-05
Q-119C	600	26.4	145.3	9.59e-05
Q-119C	640	26.6	141.5	0.000103
Q-119C	650	27.3	144.6	9.38e-05
Q-119C	670	21.6	145.2	5.66e-05
Q-119C	680	30.8	152.2	1.74e-05
Q-120A	20	62.3	352.1	1.21e-05	20	1
Q-120A	200	62.6	20.7	9.24e-06	200	0.764
Q-120A	300	63.3	26	8.66e-06	300	0.716
Q-120A	400	66.8	48	7.77e-06	400	0.642
Q-120A	450	66.8	53.5	8.51e-06	450	0.703
Q-120A	500	76	70	8.69e-06	500	0.718
Q-120A	550	72.9	78.6	7.88e-06	550	0.651
Q-120A	600	60.6	127	5.46e-06	600	0.451
Q-120A	620	49.8	113.9	3.97e-06	620	0.328
Q-120A	640	56.7	184.6	4.26e-06	640	0.352
Q-120A	650	49.8	127.6	3.18e-06	650	0.263
Q-120A	670	65.9	132.2	3.37e-06	670	0.279
Q-120A	680	47.2	215.5	2.93e-06	680	0.242
Q-120B	20	19.7	24.7	1.37e-05
Q-120B	400	27.9	27.8	7.8e-06
Q-120B	500	45.6	40.4	5.15e-06
Q-120B	550	50.7	29.8	3.78e-06
Q-120B	570	54.2	39.3	3.65e-06
Q-120B	600	42.1	47.9	4.23e-06
Q-120B	640	67.4	42.8	4.81e-06
Q-120B	650	49.8	62.8	4.15e-06
Q-120B	670	-24.6	296.4	1.43e-06
Q-120B	680	-37	233	3.68e-06
Q-120C	20	18.4	60.7	7.78e-06
Q-120C	400	25.9	117.8	4.53e-06
Q-120C	500	31.2	137.6	4.12e-06
Q-120C	550	37.8	135.5	3.29e-06
Q-120C	570	32.5	140	3.6e-06
Q-120C	600	30.5	139.2	3.9e-06
Q-120C	640	33.8	152.3	4.57e-06
Q-120C	650	26.5	125.5	4.39e-06
Q-120C	670	-4.2	168.6	3.06e-06
Q-120C	680	33.9	86.3	3.81e-06
Q-121A	20	21.2	116.2	8.1e-05	20	1
Q-121A	200	15.3	124.8	8.06e-05	200	0.995
Q-121A	300	17.9	123.2	8.1e-05	300	1
Q-121A	400	15.6	128.5	8.03e-05	400	0.991
Q-121A	450	15.4	128.2	8.11e-05	450	1
Q-121A	500	17.7	127.1	7.96e-05	500	0.983
Q-121A	550	14.6	130.5	7.7e-05	550	0.951
Q-121A	600	14.7	131	6.03e-05	600	0.744
Q-121A	620	16.3	131.6	5.76e-05	620	0.711
Q-121A	640	26.3	126.7	5.35e-05	640	0.66
Q-121A	650	13.3	132.9	5.49e-05	650	0.678
Q-121A	670	17.7	132.6	4.48e-05	670	0.553
Q-121A	680	21.3	134.9	1.03e-05	680	0.127
Q-121B	20	69.8	138.5	0.0001
Q-121B	400	33.6	142.5	7.39e-05
Q-121B	500	29.7	139.7	6.67e-05
Q-121B	550	33.1	136.9	4.9e-05
Q-121B	570	23.4	139	5.08e-05
Q-121B	600	20.8	140.1	5.58e-05
Q-121B	640	20.9	140.1	5.13e-05
Q-121B	650	18.6	139.6	5.11e-05
Q-121B	670	24.9	136.6	3.17e-05
Q-121B	680	5.9	141.3	1.3e-05
Q-121C	20	73.7	266.1	0.000164
Q-121C	400	66.6	151.1	8.13e-05
Q-121C	500	53.1	146.1	6.05e-05
Q-121C	550	49.8	137.9	4.46e-05
Q-121C	570	36.5	140	4.26e-05
Q-121C	600	32	139.7	4.07e-05
Q-121C	640	30	139.8	4.27e-05
Q-121C	650	29.3	139.5	4.07e-05
Q-121C	670	29	142	2.37e-05
Q-121C	680	21.8	138.1	1.31e-05
Q-122A	20	40	109.4	7.03e-05	20	1
Q-122A	200	39.5	115.8	6.88e-05	200	0.979
Q-122A	300	38.3	117.5	6.95e-05	300	0.989
Q-122A	400	44.6	126.1	7.18e-05	400	1.02
Q-122A	450	39.4	121.8	7.3e-05	450	1.04
Q-122A	500	43.8	125.7	7.22e-05	500	1.03
Q-122A	550	43.8	124.9	6.85e-05	550	0.974
Q-122A	600	42.3	125.8	5.44e-05	600	0.774
Q-122A	620	43.2	128.2	5.24e-05	620	0.745
Q-122A	640	51.7	139.2	4.93e-05	640	0.701
Q-122A	650	36.5	124.9	4.87e-05	650	0.693
Q-122A	670	41.6	124.6	3.79e-05	670	0.539
Q-122A	680	51.1	134.2	1.47e-05	680	0.209
Q-122B	20	35.1	100.4	4.13e-05
Q-122B	400	38.9	122.5	3.87e-05
Q-122B	500	37.2	127.2	3.46e-05
Q-122B	550	43.1	126.4	2.48e-05
Q-122B	570	39.4	130.4	2.32e-05
Q-122B	600	43.2	130.9	2.47e-05
Q-122B	640	43	135.7	2.42e-05
Q-122B	650	39.8	130.7	2.48e-05
Q-122B	670	33.3	139.7	1.66e-05
Q-122B	680	25.8	115.7	1.02e-05
Q-122C	20	32.1	108.6	4.43e-05
Q-122C	400	35.1	125.6	4.02e-05
Q-122C	500	37.1	128	3.71e-05
Q-122C	550	46.6	134.2	2.57e-05
Q-122C	570	38	130.6	2.76e-05
Q-122C	600	37.6	129.3	2.41e-05
Q-122C	640	38.2	131.5	2.61e-05
Q-122C	650	32.3	128.3	2.6e-05
Q-122C	670	39.5	134.8	1.77e-05
Q-122C	680	37.2	113.1	1.19e-05
Q-123A	20	0.6	154.6	4.84e-05	20	1
Q-123A	200	7.1	153.1	4.83e-05	200	0.998
Q-123A	300	12.3	149.2	4.88e-05	300	1.01
Q-123A	400	24.1	140.2	5.08e-05	400	1.05
Q-123A	450	13.5	146.6	5.08e-05	450	1.05
Q-123A	500	13.9	147.1	4.9e-05	500	1.01
Q-123A	550	13.6	145.8	4.33e-05	550	0.895
Q-123A	600	17.4	142.9	3.53e-05	600	0.729
Q-123A	620	15.4	143.7	3.4e-05	620	0.702
Q-123A	640	32.4	133.9	3.06e-05	640	0.632
Q-123A	650	12.8	146.6	3.23e-05	650	0.667
Q-123A	670	14.4	146.2	2.58e-05	670	0.533
Q-123A	680	17	127.9	1.28e-05	680	0.264
Q-123B	20	22	134	3.77e-05
Q-123B	400	22	144.6	4.45e-05
Q-123B	500	21.1	146.4	2.95e-05
Q-123B	550	26.2	142.2	2.13e-05
Q-123B	570	22.6	147.7	2.02e-05
Q-123B	600	18.4	146.6	2.17e-05
Q-123B	640	22.4	146.5	2.31e-05
Q-123B	650	22.7	147.5	2.12e-05
Q-123B	670	22.6	147.6	1.72e-05
Q-123B	680	4	147.6	7.98e-06
Q-123C	20	20	134.1	5.13e-05
Q-123C	400	18.2	141.8	5.08e-05
Q-123C	500	22.4	142.9	3.32e-05
Q-123C	550	23	141.2	2.43e-05
Q-123C	570	20.5	143	2.3e-05
Q-123C	600	17.7	143.3	2.38e-05
Q-123C	640	16.1	144	2.52e-05
Q-123C	650	18.8	142.4	2.41e-05
Q-123C	670	19.3	142.3	2.03e-05
Q-123C	680	22.4	133.9	1.05e-05
Q-124A	20	5.9	130.6	2.66e-05	20	1
Q-124A	200	10.4	133.2	2.76e-05	200	1.04
Q-124A	300	15	133.7	2.9e-05	300	1.09
Q-124A	400	25.4	137.4	3.06e-05	400	1.15
Q-124A	450	17.7	135.9	3.14e-05	450	1.18
Q-124A	500	19	137.9	2.97e-05	500	1.12
Q-124A	550	12.4	140.2	2.33e-05	550	0.876
Q-124A	600	15.7	141.1	1.89e-05	600	0.711
Q-124A	620	16	141.2	1.88e-05	620	0.707
Q-124A	640	20.6	144.2	1.74e-05	640	0.654
Q-124A	650	12.3	145.4	1.71e-05	650	0.643
Q-124A	670	13.9	150.6	1.25e-05	670	0.47
Q-124A	680	0.3	137.1	6.71e-06	680	0.252
Q-124B	20	26.5	228	1.08e-05
Q-124B	400	33.5	164	1.85e-05
Q-124B	500	44.8	157.1	1.5e-05
Q-124B	550	51.2	149.1	1.24e-05
Q-124B	570	46	147.2	1.12e-05
Q-124B	600	45.1	145.3	1.14e-05
Q-124B	640	43.7	144.6	1.13e-05
Q-124B	650	43.2	144.3	1.12e-05
Q-124B	670	36.8	157	7.71e-06
Q-124B	680	37.1	158.8	3.84e-06
Q-124C	20	71.1	121.5	1.78e-05
Q-124C	400	62.4	139	2.33e-05
Q-124C	500	61.9	137.3	1.74e-05
Q-124C	550	70.2	135.1	1.3e-05
Q-124C	570	67.5	131.5	1.14e-05
Q-124C	600	62	128.6	1.14e-05
Q-124C	640	62	121.4	1.16e-05
Q-124C	650	58.4	122	1.17e-05
Q-124C	670	61.8	134.9	7.87e-06
Q-124C	680	75	125	4.5e-06
Q-125A	20	10	104.5	0.000106	20	1
Q-125A	200	13.9	132.6	0.000135	200	1.27
Q-125A	300	15.6	136.7	0.000147	300	1.39
Q-125A	400	20.7	139.5	0.000166	400	1.57
Q-125A	450	9.7	142.3	0.000166	450	1.57
Q-125A	500	12.7	142.8	0.000151	500	1.42
Q-125A	550	9.2	144.2	0.000135	550	1.27
Q-125A	600	12.2	146.3	0.000119	600	1.12
Q-125A	620	12.7	142.4	0.000114	620	1.08
Q-125A	640	23.3	140.9	0.000105	640	0.991
Q-125A	650	9.2	143.4	0.000107	650	1.01
Q-125A	670	13.9	147.4	6.77e-05	670	0.639
Q-125A	680	10.6	147.1	3.58e-05	680	0.338
Q-125B	20	15.9	112.3	8.12e-05
Q-125B	400	15.9	140.4	0.000108
Q-125B	500	19.9	141.2	8.21e-05
Q-125B	550	27.7	140	6.03e-05
Q-125B	570	16.1	143.5	8.29e-05
Q-125B	600	16.7	141	5.94e-05
Q-125B	640	21.2	138.3	7.12e-05
Q-125B	650	25.1	143.7	5.92e-05
Q-125B	670	13.5	146	2.05e-05
Q-125B	680	70.2	205	4.59e-06
Q-125C	20	16.2	107.2	5.61e-05
Q-125C	400	20.4	139.3	7.38e-05
Q-125C	500	21.3	139.6	6.09e-05
Q-125C	550	26.1	137.6	4.97e-05
Q-125C	570	20	141.7	6.05e-05
Q-125C	600	18.2	139	4.73e-05
Q-125C	640	14.3	139.5	5.19e-05
Q-125C	650	14	141.2	4.67e-05
Q-125C	670	6.7	136.9	2.45e-05
Q-125C	680	5.6	134.3	9.65e-06
Q-126A	20	18.8	42.2	2.2e-05	20	1
Q-126A	200	36.7	68.1	1.62e-05	200	0.736
Q-126A	300	39.1	78.9	1.84e-05	300	0.836
Q-126A	400	51.7	83.8	1.98e-05	400	0.9
Q-126A	450	36.7	90.3	2.19e-05	450	0.995
Q-126A	500	33.5	87.9	1.79e-05	500	0.814
Q-126A	550	26.7	92.2	1.64e-05	550	0.745
Q-126A	600	31.9	91.4	1.71e-05	600	0.777
Q-126A	620	31.9	91.9	1.56e-05	620	0.709
Q-126A	640	44.2	89.7	1.4e-05	640	0.636
Q-126A	650	28.1	96.8	1.48e-05	650	0.673
Q-126A	670	27	84.3	7.16e-06	670	0.325
Q-126A	680	22.4	84.4	3.8e-06	680	0.173
Q-126B	20	37.8	92.3	2.67e-05
Q-126B	400	27	119.9	1.96e-05
Q-126B	500	26	117.8	1.47e-05
Q-126B	550	33	116.3	1.28e-05
Q-126B	570	23.6	117.6	1.68e-05
Q-126B	600	26.8	116.7	1.08e-05
Q-126B	640	26.8	118.5	9.08e-06
Q-126B	650	30.5	119.2	9.57e-06
Q-126B	670	32.8	107.6	6e-06
Q-126B	680	-12.6	113	4.46e-06
Q-126C	20	11.2	59.1	2.34e-05
Q-126C	400	19.7	79.9	1.63e-05
Q-126C	500	22	88.9	1.37e-05
Q-126C	550	24.8	86.8	1.11e-05
Q-126C	570	21.3	86.8	1.38e-05
Q-126C	600	16.6	95.3	1e-05
Q-126C	640	14	96.2	9.33e-06
Q-126C	650	16.8	98.2	9.95e-06
Q-126C	670	5.1	86.3	3.73e-06
Q-126C	680	53.7	136.1	3.98e-06
Q-127A	20	30.1	41.9	6.39e-05	20	1
Q-127A	200	28.9	57.8	5.45e-05	200	0.853
Q-127A	300	28.5	60	5.41e-05	300	0.847
Q-127A	400	30.9	70.9	4.81e-05	400	0.753
Q-127A	450	26.1	85.3	4.56e-05	450	0.714
Q-127A	500	29.1	90.1	3.57e-05	500	0.559
Q-127A	550	28.8	94	3.19e-05	550	0.499
Q-127A	600	26.7	95.4	2.89e-05	600	0.452
Q-127A	620	34	96.5	2.84e-05	620	0.444
Q-127A	640	48.5	91.6	2.67e-05	640	0.418
Q-127A	650	26.1	101.7	2.66e-05	650	0.416
Q-127A	670	21.5	128.3	1.48e-05	670	0.232
Q-127A	680	31.1	124.1	1.14e-05	680	0.178
Q-127B	20	29.9	63.8	3.44e-05
Q-127B	400	42.8	97.3	2.91e-05
Q-127B	500	41	101.9	2.55e-05
Q-127B	550	49	100.5	2.29e-05
Q-127B	570	43.3	103.7	2.73e-05
Q-127B	600	40.6	107	1.92e-05
Q-127B	640	43.9	109.9	1.99e-05
Q-127B	650	36.6	114.6	1.96e-05
Q-127B	670	45.4	129.4	1.21e-05
Q-127B	680	57.7	130.8	5.11e-06
Q-127C	20	11.4	45	4.98e-05
Q-127C	400	22.4	90.4	3.23e-05
Q-127C	500	16	100.9	2.58e-05
Q-127C	550	22.9	99.4	2.11e-05
Q-127C	570	17.8	100.7	2.58e-05
Q-127C	600	15	107.5	1.91e-05
Q-127C	640	20.1	111.5	2.06e-05
Q-127C	650	20.7	112	1.92e-05
Q-127C	670	18.8	129.4	1.31e-05
Q-127C	680	11.3	128.8	5.82e-06
Q-128A	20	43.9	82.3	4.79e-05	20	1
Q-128A	200	40.7	98.3	4.61e-05	200	0.962
Q-128A	300	37.3	105	4.78e-05	300	0.998
Q-128A	400	39.2	114.9	5.18e-05	400	1.08
Q-128A	450	36.2	122.2	5.33e-05	450	1.11
Q-128A	500	37.2	125.3	4.75e-05	500	0.992
Q-128A	550	32.9	125.9	4.16e-05	550	0.868
Q-128A	600	32	126.9	3.9e-05	600	0.814
Q-128A	620	30.4	127.7	3.78e-05	620	0.789
Q-128A	640	44.7	132.4	3.47e-05	640	0.724
Q-128A	650	31.5	129.4	3.51e-05	650	0.733
Q-128A	670	27.9	146.7	1.36e-05	670	0.284
Q-128A	680	27	138	1.17e-05	680	0.244
Q-128B	20	22.9	103	8.81e-05
Q-128B	400	16.6	120	6.75e-05
Q-128B	500	25.1	125.6	6.05e-05
Q-128B	550	33.6	123.6	5.09e-05
Q-128B	570	26.6	127.3	5.75e-05
Q-128B	600	22.6	122.4	4.46e-05
Q-128B	640	28.8	123.6	4.52e-05
Q-128B	650	27.2	123.5	4.34e-05
Q-128B	670	16	130.3	2.7e-05
Q-128B	680	-7.9	144.2	8.34e-06
Q-128C	20	16.5	328	3.21e-05
Q-128C	400	45.8	120	2.86e-05
Q-128C	500	36.3	118.6	3.45e-05
Q-128C	550	45.1	115.5	2.86e-05
Q-128C	570	38	116.7	3.55e-05
Q-128C	600	33.8	118	2.99e-05
Q-128C	640	36.2	123	3.08e-05
Q-128C	650	36	124.7	3.04e-05
Q-128C	670	32.4	141.7	1.91e-05
Q-128C	680	45.5	165.5	6.76e-06
Q-129A	20	2	5.3	0.00019	20	1
Q-129A	200	3.2	4.1	0.000153	200	0.805
Q-129A	300	6.7	5	0.00014	300	0.737
Q-129A	400	10.6	4.7	0.000111	400	0.584
Q-129A	450	10.3	2.6	8.99e-05	450	0.473
Q-129A	500	9.2	2.8	7.37e-05	500	0.388
Q-129A	550	12.7	3.5	6.21e-05	550	0.327
Q-129A	600	12	4.7	5.45e-05	600	0.287
Q-129A	620	8.2	2.7	4.97e-05	620	0.262
Q-129A	640	1.2	0.8	4.16e-05	640	0.219
Q-129A	650	6.3	0.9	4.19e-05	650	0.221
Q-129A	670	-74.3	310.7	2.34e-06	670	0.0123
Q-129A	680	-9	325.3	3.13e-06	680	0.0165
Q-129B	400	7.8	10	4.94e-05
Q-129B	500	1	24	8.21e-05
Q-129B	550	-2.5	5.4	3.16e-05
Q-129B	570	9.3	10.5	3.91e-05
Q-129B	600	2.5	7	2.85e-05
Q-129B	640	7.6	4.3	2.85e-05
Q-129B	650	5.8	5	2.41e-05
Q-129B	670	20.9	352.5	4.52e-06
Q-129B	680	72.1	266.1	5.52e-06
Q-129C	400	-14.1	348.8	1.33e-05
Q-129C	500	3.4	351	2.27e-05
Q-129C	550	4.5	356.7	2.17e-05
Q-129C	570	14.8	356.4	2.67e-05
Q-129C	600	11.6	355.6	2.26e-05
Q-129C	640	16.7	351.5	2.32e-05
Q-129C	650	10.4	352.8	1.83e-05
Q-129C	670	42.5	326.4	5.72e-06
Q-129C	680	31.5	286.5	7.42e-06
Q-130A	20	21.3	127.6	2.67e-05	20	1
Q-130A	200	14.1	151.3	3.03e-05	200	1.13
Q-130A	300	13.6	148	3.06e-05	300	1.15
Q-130A	400	26.3	152.5	3.11e-05	400	1.16
Q-130A	450	17.6	147	3.35e-05	450	1.25
Q-130A	500	17.8	152.7	3.02e-05	500	1.13
Q-130A	550	14.4	153.4	2.66e-05	550	0.996
Q-130A	600	17.1	156.4	2.43e-05	600	0.91
Q-130A	620	16.1	151.1	2.51e-05	620	0.94
Q-130A	640	29.3	161.3	2.19e-05	640	0.82
Q-130A	650	20.2	152.7	2.21e-05	650	0.828
Q-130A	670	33.6	145.9	1.14e-05	670	0.427
Q-130A	680	-63.8	83.3	2.43e-06	680	0.091
Q-130B	400	8	144.4	1.98e-05
Q-130B	500	10	144.7	1.67e-05
Q-130B	550	16.5	148.1	1.34e-05
Q-130B	570	8.1	148.1	1.6e-05
Q-130B	600	5.1	146.4	1.26e-05
Q-130B	640	4.2	151.6	1.21e-05
Q-130B	650	0.3	151.3	1.2e-05
Q-130B	670	-6.3	154.3	1.09e-05
Q-130B	680	-7.1	151.3	7.16e-06
Q-130C	20	-7	126.9	1.62e-05
Q-130C	400	-5.9	145.4	2.33e-05
Q-130C	500	-1.3	149.4	1.97e-05
Q-130C	550	4.5	148.4	1.34e-05
Q-130C	570	-1.4	147.4	1.43e-05
Q-130C	600	-1.7	146.6	1.23e-05
Q-130C	640	-2.8	150	1.26e-05
Q-130C	650	1.4	147.3	1.31e-05
Q-130C	670	3	151.3	1.17e-05
Q-130C	680	4.9	155.1	5.87e-06
Q-131A	20	1.9	73.6	2.45e-05	20	1
Q-131A	200	3.8	142.2	3.84e-05	200	1.57
Q-131A	300	5.8	143.6	4.25e-05	300	1.73
Q-131A	400	14.5	144.5	4.61e-05	400	1.88
Q-131A	450	2.5	144.3	4.74e-05	450	1.93
Q-131A	500	3.9	144.3	4.03e-05	500	1.64
Q-131A	550	0.7	144	3.68e-05	550	1.5
Q-131A	600	5.8	144.5	3.47e-05	600	1.42
Q-131A	620	4.9	141	3.22e-05	620	1.31
Q-131A	640	8.2	142	2.68e-05	640	1.09
Q-131A	650	-2.3	142.9	2.82e-05	650	1.15
Q-131A	670	-47.5	156.2	1.06e-05	670	0.433
Q-131A	680	-67.6	173.5	4.08e-06	680	0.167
Q-131B	20	14.5	126.8	7.67e-05
Q-131B	400	3.7	141.7	3.72e-05
Q-131B	500	5.1	143.9	3.12e-05
Q-131B	550	5.2	142.9	2.24e-05
Q-131B	570	-2.1	145.8	2.16e-05
Q-131B	600	-6.6	144.7	1.78e-05
Q-131B	640	-12.6	144.3	1.84e-05
Q-131B	650	-11.6	145.9	1.77e-05
Q-131B	670	-13.4	142.7	1.27e-05
Q-131B	680	-30.1	143.6	5.18e-06
Q-131C	20	13.3	107.6	3.17e-05
Q-131C	400	4	145.4	2.72e-05
Q-131C	500	-1.6	146.9	2.23e-05
Q-131C	550	2	146.8	1.62e-05
Q-131C	570	-1.4	146.9	1.65e-05
Q-131C	600	-3	146.4	1.53e-05
Q-131C	640	-6.7	147.5	1.66e-05
Q-131C	650	-13.4	145.4	1.51e-05
Q-131C	670	-16.7	148.1	1.25e-05
Q-131C	680	-6.7	141.5	5.92e-06
Q-132A	20	-16	331.8	6.2e-05	20	1
Q-132A	200	-20.7	315.4	4.78e-05	200	0.771
Q-132A	300	-21.5	311	4.77e-05	300	0.769
Q-132A	400	-31.6	310.4	4.93e-05	400	0.795
Q-132A	450	-22.8	313.3	4.54e-05	450	0.732
Q-132A	500	-24	314.9	4.3e-05	500	0.694
Q-132A	550	-25.1	316.2	3.72e-05	550	0.6
Q-132A	600	-26.9	317.5	3.63e-05	600	0.585
Q-132A	620	-27.6	320.6	3.13e-05	620	0.505
Q-132A	640	-36.8	319	3.12e-05	640	0.503
Q-132A	650	-30.7	325.7	2.7e-05	650	0.435
Q-132A	670	-52.9	30.1	1.27e-05	670	0.205
Q-132A	680	-60.3	7.2	6.59e-06	680	0.106
Q-132B	20	-30.4	333.9	4.71e-05
Q-132B	400	-30.3	307.5	5.04e-05
Q-132B	500	-35.2	309.6	3.88e-05
Q-132B	550	-43.1	310	2.81e-05
Q-132B	570	-33.3	309.2	3.59e-05
Q-132B	600	-33.9	308.9	2.7e-05
Q-132B	640	-29.9	306	2.89e-05
Q-132B	650	-32.6	310.1	2.72e-05
Q-132B	670	-30.3	305.4	2.5e-05
Q-132B	680	-33.2	316.9	1.13e-05
Q-132C	20	-24	330.8	3.96e-05
Q-132C	400	-27.3	309.5	3.7e-05
Q-132C	500	-21.9	306.3	2.86e-05
Q-132C	550	-31.8	308.8	2.25e-05
Q-132C	570	-24.1	308.5	2.77e-05
Q-132C	600	-28.7	306.3	2.52e-05
Q-132C	640	-28.2	305.5	2.1e-05
Q-132C	650	-26.6	309.9	2.07e-05
Q-132C	670	-34.1	304.1	1.63e-05
Q-132C	680	-39	314.7	8.24e-06
Q-133A	20	-18.1	345.4	0.000115	20	1
Q-133A	200	-34.8	347.3	9.25e-05	200	0.804
Q-133A	300	-40.8	345.8	8.27e-05	300	0.719
Q-133A	400	-39.9	339.1	7.59e-05	400	0.66
Q-133A	450	-47.8	341.2	6.61e-05	450	0.575
Q-133A	500	-43.3	339.9	5.81e-05	500	0.505
Q-133A	550	-45.5	341.3	5.34e-05	550	0.464
Q-133A	570	-44.8	340.6	4.63e-05	570	0.403
Q-133A	600	-44.3	339.2	4.76e-05	600	0.414
Q-133A	620	-47.7	338.8	4.3e-05	620	0.374
Q-133A	640	-58.9	344.7	4.26e-05	640	0.37
Q-133A	650	-55.2	345.1	3.43e-05	650	0.298
Q-133A	670	-73	344	2.06e-05	670	0.179
Q-133A	680	-55.1	356.6	9.31e-06	680	0.081
Q-133B	20	-34.7	343	7.35e-05
Q-133B	400	-47.4	326.5	6.38e-05
Q-133B	500	-45.8	325.3	5.87e-05
Q-133B	550	-53.1	321.4	3.93e-05
Q-133B	570	-50.2	324.2	4.61e-05
Q-133B	600	-48.9	320.8	3.89e-05
Q-133B	640	-47.3	323.8	3.36e-05
Q-133B	650	-44.7	323.4	3.01e-05
Q-133B	670	-83.4	320.9	9.97e-06
Q-133B	680	27.5	131	8.53e-06
Q-133C	20	-38.4	330.8	0.000117
Q-133C	400	-40	326.5	8.78e-05
Q-133C	500	-43.3	324.8	8.13e-05
Q-133C	550	-49.8	319.9	5.96e-05
Q-133C	570	-38.7	325.5	6.47e-05
Q-133C	600	-37.1	325.3	5.01e-05
Q-133C	640	-42.5	322.9	4.69e-05
Q-133C	650	-43.1	322.1	4.4e-05
Q-133C	670	-51	326.4	1.85e-05
Q-133C	680	68.1	71	8.42e-06
Q-134A	20	-9.1	319.3	9.02e-05	20	1
Q-134A	200	-22.4	311.4	8.22e-05	200	0.911
Q-134A	300	-20.7	304.7	8.53e-05	300	0.946
Q-134A	400	-17.2	300.8	8.81e-05	400	0.977
Q-134A	450	-19.6	299.3	8.71e-05	450	0.966
Q-134A	500	-20.2	298.6	8.02e-05	500	0.889
Q-134A	550	-20.5	298.6	7.14e-05	550	0.792
Q-134A	570	-22.8	301.3	6.3e-05	570	0.698
Q-134A	600	-20.6	299.6	6.24e-05	600	0.692
Q-134A	620	-18.9	298.9	6.08e-05	620	0.674
Q-134A	640	-35.3	293.5	5.79e-05	640	0.642
Q-134A	650	-17	301.4	5.15e-05	650	0.571
Q-134A	670	-32.9	292.3	2.31e-05	670	0.256
Q-134A	680	-13.9	297.7	1.87e-05	680	0.207
Q-134B	20	-7.9	324.7	8.69e-05
Q-134B	400	-13.8	309.7	8.93e-05
Q-134B	500	-8.8	312.8	8.13e-05
Q-134B	550	-19.6	307.4	6.27e-05
Q-134B	570	-10.4	311.7	6.59e-05
Q-134B	600	-9.4	305.7	4.66e-05
Q-134B	640	-9	309.3	4.56e-05
Q-134B	650	-8.6	307.7	4.19e-05
Q-134B	670	-7.9	310.8	2.76e-05
Q-134B	680	43.9	349.4	5.55e-06
Q-134C	20	-19.5	318.8	6.04e-05
Q-134C	400	-19.2	302.1	6.39e-05
Q-134C	500	-21.3	300.3	5.85e-05
Q-134C	550	-27.3	296.1	5.18e-05
Q-134C	570	-22.4	299.2	5.57e-05
Q-134C	600	-18.2	298.1	3.76e-05
Q-134C	640	-17.6	296.7	3.86e-05
Q-134C	650	-18.1	293.6	3.43e-05
Q-134C	670	-27	291.2	2.28e-05
Q-134C	680	-34.5	199.8	3.93e-06
Q-135A	20	-6.2	341.8	0.000141	20	1
Q-135A	200	-7.7	339	0.000106	200	0.752
Q-135A	300	2.1	335.8	8.81e-05	300	0.625
Q-135A	400	-2.6	335.6	8.8e-05	400	0.624
Q-135A	450	1.6	333.9	7.44e-05	450	0.528
Q-135A	500	3.5	330	6.13e-05	500	0.435
Q-135A	550	5.5	327.8	5.77e-05	550	0.409
Q-135A	570	6.5	326.6	4.87e-05	570	0.345
Q-135A	600	9	331.1	4.84e-05	600	0.343
Q-135A	620	12.3	333.1	4.28e-05	620	0.304
Q-135A	640	-19	328.3	4.24e-05	640	0.301
Q-135A	650	7	330	3.89e-05	650	0.276
Q-135A	670	0.4	325.9	1.82e-05	670	0.129
Q-135A	680	14.3	321	1.69e-05	680	0.12
Q-135B	20	-33.2	320.1	7.52e-05
Q-135B	400	-7	315.3	5.7e-05
Q-135B	500	-6	320.2	5.7e-05
Q-135B	550	-5.1	316.2	3.64e-05
Q-135B	570	0.1	314.2	3.72e-05
Q-135B	600	5.1	317.6	3.32e-05
Q-135B	640	3.3	315	3.56e-05
Q-135B	650	3.6	313.4	3.35e-05
Q-135B	670	4.7	312.1	2.29e-05
Q-135B	680	24.7	297	6.67e-06
Q-135C	20	-19.5	351.6	5.05e-05
Q-135C	400	2.7	327	5.08e-05
Q-135C	500	-6	322	5.53e-05
Q-135C	550	-5.4	319.4	3.78e-05
Q-135C	570	-1.1	318.6	4.66e-05
Q-135C	600	-1.4	320.9	3.76e-05
Q-135C	640	-3.9	320	4.04e-05
Q-135C	650	-1	318.2	3.68e-05
Q-135C	670	2.5	316.5	2.45e-05
Q-135C	680	25.2	324.9	1.17e-05
Q-136A	20	-10.7	7	3.58e-05	20	1
Q-136A	200	-18.6	6.2	3.55e-05	200	0.992
Q-136A	300	-23.4	3	3.58e-05	300	1
Q-136A	400	-24.8	2.3	3.59e-05	400	1
Q-136A	450	-29.3	6.1	3.24e-05	450	0.905
Q-136A	500	-29.2	3	2.71e-05	500	0.757
Q-136A	550	-32.1	1.7	2.77e-05	550	0.774
Q-136A	570	-35	357.5	2.16e-05	570	0.603
Q-136A	600	-29.8	356.8	2.1e-05	600	0.587
Q-136A	620	-32.1	356.5	2.11e-05	620	0.589
Q-136A	640	-44	347.9	2.03e-05	640	0.567
Q-136A	650	-34.5	356.6	1.86e-05	650	0.52
Q-136A	670	-55	323.8	1.35e-05	670	0.377
Q-136A	680	-46.3	327.2	5.95e-06	680	0.166
Q-136B	20	-22.1	14.9	1.88e-05
Q-136B	400	-22.5	2.9	1.79e-05
Q-136B	500	-12.2	7.5	1.79e-05
Q-136B	550	-31.5	360	1.08e-05
Q-136B	570	-23.4	18.6	1.42e-05
Q-136B	600	-31.7	10.3	1.09e-05
Q-136B	640	-28.4	3.8	1.04e-05
Q-136B	650	-12.7	8.2	9.1e-06
Q-136B	670	-20	31.5	6.5e-06
Q-136B	680	-38.6	93.5	3.17e-06
Q-136C	20	6.9	14.4	2.56e-05
Q-136C	400	0.4	14.3	2.27e-05
Q-136C	500	2	16.8	2.41e-05
Q-136C	550	-5.3	358.6	1.41e-05
Q-136C	570	1.1	10.2	1.91e-05
Q-136C	600	2.5	6.7	1.43e-05
Q-136C	640	1.6	7.6	1.51e-05
Q-136C	650	2.8	1.2	1.45e-05
Q-136C	670	10.1	1.3	1.23e-05
Q-136C	680	26.1	10.8	5.43e-06
Q-137A	20	1.1	321.2	8.69e-05	20	1
Q-137A	200	-2.7	320.8	7.75e-05	200	0.892
Q-137A	300	-4.7	317.1	7.04e-05	300	0.81
Q-137A	400	4.9	314.5	7.06e-05	400	0.812
Q-137A	450	-6.1	314.6	6.33e-05	450	0.728
Q-137A	500	-4.1	315.4	5.86e-05	500	0.674
Q-137A	550	-7.2	316.9	5.86e-05	550	0.674
Q-137A	570	-9.6	319.5	4.11e-05	570	0.473
Q-137A	600	-7.8	318.5	3.93e-05	600	0.452
Q-137A	620	-9.9	318	3.61e-05	620	0.415
Q-137A	640	-18.9	320.8	3.5e-05	640	0.403
Q-137A	650	-6.8	320.1	3.25e-05	650	0.374
Q-137A	670	-14.4	314.1	1.99e-05	670	0.229
Q-137A	680	-12.6	313.3	1.44e-05	680	0.166
Q-137B	20	-29	328	9.12e-05
Q-137B	400	-20.1	322.6	6.86e-05
Q-137B	500	-17.7	322.5	6.38e-05
Q-137B	550	-20.2	322.7	3.89e-05
Q-137B	570	-16	325.9	5.59e-05
Q-137B	600	-13.6	326	3.99e-05
Q-137B	640	-13.3	325.1	4.12e-05
Q-137B	650	-15.2	323.5	3.89e-05
Q-137B	670	-11.9	326	3.16e-05
Q-137B	680	0.9	323	6.68e-06
Q-137C	20	1.1	339.4	4.85e-05
Q-137C	400	-11.4	330.8	5.64e-05
Q-137C	500	-8.7	331.2	5.24e-05
Q-137C	550	-14.1	326.2	3.5e-05
Q-137C	570	-7.9	328	4.6e-05
Q-137C	600	-11.5	325.2	3.61e-05
Q-137C	640	-6.1	323.9	3.84e-05
Q-137C	650	-9.1	325.2	3.45e-05
Q-137C	670	-7.5	324.5	2.77e-05
Q-137C	680	-39.7	317.9	9.7e-06
Q-138A	20	-25.2	355.7	4.71e-05	20	1
Q-138A	200	-30.2	352.2	4.49e-05	200	0.953
Q-138A	300	-37.2	345.1	4.47e-05	300	0.949
Q-138A	400	-40.9	335.2	4.9e-05	400	1.04
Q-138A	450	-45.2	331.4	4.93e-05	450	1.05
Q-138A	500	-44.9	327.5	5.22e-05	500	1.11
Q-138A	550	-47.1	327.3	5.19e-05	550	1.1
Q-138A	570	-33.6	321	4.4e-05	570	0.934
Q-138A	600	-34	317.4	4.41e-05	600	0.936
Q-138A	620	-34.7	313.8	4.18e-05	620	0.887
Q-138A	640	-46.7	309.1	4e-05	640	0.849
Q-138A	650	-38.2	316.9	3.96e-05	650	0.841
Q-138A	670	-45.4	303.2	2.36e-05	670	0.501
Q-138A	680	-34.1	308.7	1.78e-05	680	0.378
Q-138B	20	-16.4	328.1	3.17e-05
Q-138B	400	-23.8	309.7	3.86e-05
Q-138B	500	-30.7	310.8	3.96e-05
Q-138B	550	-35.3	305.6	2.77e-05
Q-138B	570	-29.8	314.5	3.53e-05
Q-138B	600	-33.5	309	2.89e-05
Q-138B	640	-28.8	313.1	2.83e-05
Q-138B	650	-29.3	313.1	2.75e-05
Q-138B	670	-23.3	309.9	2.37e-05
Q-138B	680	-11.7	323.7	8.46e-06
Q-138C	20	-17.7	347.5	2.73e-05
Q-138C	400	-33.4	332.2	2.86e-05
Q-138C	500	-39.3	338.4	2.23e-05
Q-138C	550	-41.8	327.3	1.63e-05
Q-138C	570	-39.3	343.5	2.02e-05
Q-138C	600	-38.4	336.7	1.72e-05
Q-138C	640	-35.5	340.7	1.61e-05
Q-138C	650	-29.9	339.2	1.8e-05
Q-138C	670	-32.6	335.5	1.59e-05
Q-138C	680	51.3	346	5.51e-06
Q-139A	20	-8.5	303.1	3.86e-05	20	1
Q-139A	200	-14.1	297	4.02e-05	200	1.04
Q-139A	300	-18.4	288.2	4e-05	300	1.04
Q-139A	400	-15	290.2	4.52e-05	400	1.17
Q-139A	450	-20	288	4.45e-05	450	1.15
Q-139A	500	-29.7	283.1	4.65e-05	500	1.2
Q-139A	550	-17.6	289.9	4.81e-05	550	1.25
Q-139A	570	-29.3	280.9	2.83e-05	570	0.733
Q-139A	600	-23	283.1	2.65e-05	600	0.687
Q-139A	620	-28.8	271.6	2.62e-05	620	0.679
Q-139A	640	-30.5	274.5	2.53e-05	640	0.655
Q-139A	650	-26.1	278.2	2.68e-05	650	0.694
Q-139A	670	-36.5	266.6	2.07e-05	670	0.536
Q-139A	680	-30.6	280.3	1.28e-05	680	0.332
Q-139B	20	-25.8	334.3	3.41e-05
Q-139B	400	-35.8	317.6	3.63e-05
Q-139B	500	-42.8	316.1	3.52e-05
Q-139B	550	-40.5	309.6	2.59e-05
Q-139B	570	-40.1	315.2	2.94e-05
Q-139B	600	-37.3	313.1	2.4e-05
Q-139B	640	-38	312.3	2.45e-05
Q-139B	650	-38.2	311	2.4e-05
Q-139B	670	-32.5	313.7	2.04e-05
Q-139B	680	-36.6	304	4.52e-06
Q-139C	20	-22.7	342.5	2.09e-05
Q-139C	400	-34.6	321.4	2.93e-05
Q-139C	500	-35.3	313.5	3e-05
Q-139C	550	-41.4	307.2	2.36e-05
Q-139C	570	-35.8	310.3	2.54e-05
Q-139C	600	-28.8	311.8	2.09e-05
Q-139C	640	-27.1	310.4	2.39e-05
Q-139C	650	-27.1	313.2	2.2e-05
Q-139C	670	-32.3	309.9	2.16e-05
Q-139C	680	-34.7	311.8	3.55e-06
Q-140A	20	-18	333.8	0.000146	20	1
Q-140A	200	-20.8	326.5	0.000148	200	1.01
Q-140A	300	-20.5	323.9	0.00014	300	0.959
Q-140A	400	-15.3	328.3	0.000154	400	1.05
Q-140A	450	-19.3	327	0.000153	450	1.05
Q-140A	500	-15.5	327.8	0.000153	500	1.05
Q-140A	550	-21.3	327.2	0.000154	550	1.05
Q-140A	570	-19.1	331	9.37e-05	570	0.642
Q-140A	600	-21.2	333.1	8.66e-05	600	0.593
Q-140A	620	-28.2	325.4	8.17e-05	620	0.56
Q-140A	640	-34.9	325.4	8.54e-05	640	0.585
Q-140A	650	-23.4	328.2	7.88e-05	650	0.54
Q-140A	670	-21.3	323.8	6.25e-05	670	0.428
Q-140A	680	-14.1	325.6	3.77e-05	680	0.258
Q-140B	20	-12.3	337.5	6.51e-05
Q-140B	400	-10.8	333	5.86e-05
Q-140B	500	-6.6	333.8	6.27e-05
Q-140B	550	-11.9	329.2	4.35e-05
Q-140B	570	-8.1	333.9	5.33e-05
Q-140B	600	-13.2	327.4	5.3e-05
Q-140B	640	-9.6	333.4	4.52e-05
Q-140B	650	-8.2	330.8	4.58e-05
Q-140B	670	-7	328.7	3.43e-05
Q-140B	680	9.9	299.3	3.86e-06
Q-140C	20	-20.7	338	5.82e-05
Q-140C	400	-18.2	334.9	5.5e-05
Q-140C	500	-23.2	331	5.46e-05
Q-140C	550	-25.9	328.6	3.87e-05
Q-140C	570	-24.6	332	4.31e-05
Q-140C	600	-21.3	332.5	4.3e-05
Q-140C	640	-23.4	329.7	3.56e-05
Q-140C	650	-21.7	334.1	3.68e-05
Q-140C	670	-19.3	332.7	3.18e-05
Q-140C	680	-49.7	234.4	4.05e-06
Q-141A	20	24.3	108.8	1.16e-06	20	1
Q-141A	200	8.7	109.6	2.37e-07	200	0.204
Q-141A	300	14.1	167.6	2.61e-07	300	0.225
Q-141A	400	-17.3	101.7	1.28e-06	400	1.1
Q-141A	450	-68.5	155.5	1.34e-06	450	1.16
Q-141A	500	29.2	147.5	6.06e-07	500	0.522
Q-141A	550	-22	37.2	6.13e-07	550	0.528
Q-141A	570	-18.3	48.1	6.41e-07	570	0.553
Q-141A	600	-2	51.3	1.19e-06	600	1.03
Q-141A	620	-31.3	28.2	1.18e-06	620	1.02
Q-141A	640	-34.2	358	2.05e-06	640	1.77
Q-141A	650	-55.6	42.8	9.26e-07	650	0.798
Q-141A	670	-23.4	337.4	9.38e-07	670	0.809
Q-141A	680	33.9	89	7.26e-07	680	0.626
Q-141B	20	57.8	39	1.38e-06
Q-141B	400	66.5	36.7	7.9e-07
Q-141B	500	39.8	13.4	1.22e-06
Q-141B	550	62.9	327.9	8.09e-07
Q-141B	570	41.5	316.8	8.54e-07
Q-141B	600	72.9	269.8	4.51e-07
Q-141B	640	82.8	326.5	4.28e-07
Q-141B	650	53.1	1.5	4.2e-07
Q-141B	670	-36.8	220.3	6.68e-07
Q-141B	680	-37	248.6	1.34e-06
Q-141C	20	5.4	140.7	3.99e-06
Q-141C	400	-70.4	300.8	1.11e-06
Q-141C	500	-43.7	297.1	1.26e-06
Q-141C	550	-36	278.9	8.85e-07
Q-141C	570	-47.2	273.9	1.67e-06
Q-141C	600	-44.3	271.2	1.76e-06
Q-141C	640	-50.1	294.3	1.62e-06
Q-141C	650	-68.2	288.1	1.27e-06
Q-141C	670	-29.9	262.4	1.98e-06
Q-141C	680	-58.4	261.7	1.48e-06
Q-142A	20	18.8	3.5	5.97e-05	20	1
Q-142A	200	17	341.3	4.05e-05	200	0.678
Q-142A	300	6.6	333.9	3.27e-05	300	0.548
Q-142A	400	-5.6	336.1	3.44e-05	400	0.576
Q-142A	450	-8.1	335.4	3.37e-05	450	0.564
Q-142A	500	-9.4	332.1	3.35e-05	500	0.561
Q-142A	550	-27.2	328.9	3.03e-05	550	0.508
Q-142A	570	-28	330.7	2.56e-05	570	0.429
Q-142A	600	-25.4	335	2.76e-05	600	0.462
Q-142A	620	-22.5	341.2	2.46e-05	620	0.412
Q-142A	640	-38.8	339.1	2.35e-05	640	0.394
Q-142A	650	-25.7	334.2	2.2e-05	650	0.369
Q-142A	670	-34.9	332.2	1.9e-05	670	0.318
Q-142A	680	-8.8	315.1	3.9e-06	680	0.0653
Q-142B	20	31.1	22.4	3.3e-05
Q-142B	400	-21.4	350.9	1.57e-05
Q-142B	500	-33	333.1	2.04e-05
Q-142B	550	-42.8	326.8	1.65e-05
Q-142B	570	-37	341.5	1.98e-05
Q-142B	600	-36.4	340.1	2.11e-05
Q-142B	640	-30.2	347	1.67e-05
Q-142B	650	-37.9	337.8	1.61e-05
Q-142B	670	-33.3	327.2	9.5e-06
Q-142B	680	-59.2	237.8	2.91e-06
Q-142C	20	-63.7	265.7	2.7e-05
Q-142C	400	-54.1	290.3	1.87e-05
Q-142C	500	-33.8	315.7	1.53e-05
Q-142C	550	-30.1	301.1	9.86e-06
Q-142C	570	-33	317	1.58e-05
Q-142C	600	-29.7	310.7	1.05e-05
Q-142C	640	-36.2	311.9	8.97e-06
Q-142C	650	-26	306	8.38e-06
Q-142C	670	-44.8	286.8	5.29e-06
Q-142C	680	-55.9	256.5	4.72e-06
Q-143A	20	-29.9	351.9	1.77e-05	20	1
Q-143A	200	-38.9	344.8	1.6e-05	200	0.904
Q-143A	300	-39.8	338.5	1.65e-05	300	0.932
Q-143A	400	-40.9	330	1.89e-05	400	1.07
Q-143A	450	-41.2	332.8	1.88e-05	450	1.06
Q-143A	500	-48.4	325.9	1.59e-05	500	0.898
Q-143A	550	-51.3	319.8	1.32e-05	550	0.746
Q-143A	570	-48.3	306.6	9.99e-06	570	0.564
Q-143A	600	-33.2	313.6	9.71e-06	600	0.549
Q-143A	620	-53.7	302.6	9.57e-06	620	0.541
Q-143A	640	-54.9	302.1	1.06e-05	640	0.599
Q-143A	650	-57.1	301.6	9.21e-06	650	0.52
Q-143A	670	-67.3	288.3	9.45e-06	670	0.534
Q-143A	680	41.9	345.5	3.73e-06	680	0.211
Q-143B	20	6.1	322	1.43e-05
Q-143B	400	-2.7	312.1	1.32e-05
Q-143B	500	2	299.1	1.23e-05
Q-143B	550	0.5	300.3	8.21e-06
Q-143B	570	-3.4	304.9	1.18e-05
Q-143B	600	2.3	302.6	9.96e-06
Q-143B	640	-0.9	307.5	1.09e-05
Q-143B	650	3.2	302	9.39e-06
Q-143B	670	-8.6	296.6	5.49e-06
Q-143B	680	-46.4	326.4	3.83e-06
Q-143C	20	18.2	312.5	1.19e-05
Q-143C	400	15.9	291.3	1.19e-05
Q-143C	500	18.2	292	8.38e-06
Q-143C	550	11.7	293.3	6.69e-06
Q-143C	570	12	288.3	8.84e-06
Q-143C	600	17.2	286.8	8.89e-06
Q-143C	640	16.3	290.9	6.96e-06
Q-143C	650	19.9	282	5.43e-06
Q-143C	670	46.2	274.7	3.14e-06
Q-143C	680	33.3	194	3.69e-06	20	1
Q-144A	20	-19.5	346.3	0.000105	200	1.01
Q-144A	200	-21	342.7	0.000106	300	1.03
Q-144A	300	-19.8	342.4	0.000108	400	1.03
Q-144A	400	-17.2	341.3	0.000108	450	1.03
Q-144A	450	-20.4	340.4	0.000108	500	0.898
Q-144A	500	-22.6	337.5	9.43e-05	550	0.801
Q-144A	550	-20	339.3	8.41e-05	570	0.767
Q-144A	570	-23.5	337.2	8.05e-05	600	0.71
Q-144A	600	-21.4	338.3	7.46e-05	620	0.693
Q-144A	620	-22.2	336.5	7.28e-05	640	0.644
Q-144A	640	-32.3	329.8	6.76e-05	650	0.662
Q-144A	650	-25.8	336.1	6.95e-05	670	0.527
Q-144A	670	-21.3	332.3	5.53e-05	680	0.0892
Q-144A	680	-18.1	320.6	9.37e-06	20	0.695
Q-144B	20	-18.1	333.7	7.37e-05
Q-144B	400	-15.4	329.3	6.09e-05
Q-144B	500	-18.5	327.5	6.16e-05
Q-144B	550	-17.2	324.4	4.71e-05
Q-144B	570	-20.8	326.8	6.51e-05
Q-144B	600	-18.5	325.5	4.98e-05
Q-144B	640	-17.6	326.5	4.92e-05
Q-144B	650	-16.5	325.9	4.82e-05
Q-144B	670	-15.1	324.9	3.27e-05
Q-144B	680	-35.3	313.5	1.27e-05
Q-144C	20	-22.6	337	7.15e-05
Q-144C	400	-24.6	333.1	8.56e-05
Q-144C	500	-18.1	333.7	5.64e-05
Q-144C	550	-19.8	327.7	4.32e-05
Q-144C	570	-19.8	333.5	5.65e-05
Q-144C	600	-21.5	327	4.63e-05
Q-144C	640	-19.6	328.8	4.49e-05
Q-144C	650	-19.1	327.3	4.26e-05
Q-144C	670	-21.8	328	3.35e-05
Q-144C	680	-31.6	316	1.43e-05
Q-145A	20	-5.7	341.9	0.000105	20	1
Q-145A	200	-12.2	340.4	8.3e-05	200	0.79
Q-145A	300	-15.4	338.2	7.79e-05	300	0.742
Q-145A	400	-14.8	339.7	7.21e-05	400	0.687
Q-145A	450	-16.8	328.1	7.21e-05	450	0.687
Q-145A	500	-16.6	320.5	6.52e-05	500	0.621
Q-145A	550	-14.9	327.4	6e-05	550	0.571
Q-145A	570	-13.8	325.9	5.53e-05	570	0.527
Q-145A	600	-14.6	330.2	5.05e-05	600	0.481
Q-145A	620	-14.6	323.8	5.02e-05	620	0.478
Q-145A	640	-15.7	319.7	4.36e-05	640	0.415
Q-145A	650	-15.8	326.9	4.69e-05	650	0.447
Q-145A	670	-12.2	334.1	3.64e-05	670	0.347
Q-145A	680	-18.8	307.8	1.25e-05	680	0.119
Q-145B	20	-8.1	346.8	8.9e-05
Q-145B	400	-18.9	330.7	6.4e-05
Q-145B	500	-16.6	334.4	5.27e-05
Q-145B	550	-19.1	323.9	3.34e-05
Q-145B	570	-22.8	331.8	4.5e-05
Q-145B	600	-21.1	328.3	3.19e-05
Q-145B	640	-23.8	330.6	3.38e-05
Q-145B	650	-25.4	329.9	3.18e-05
Q-145B	670	-25	331.9	2.51e-05
Q-145B	680	-27.8	303.7	1.27e-05
Q-145C	20	-9.4	339	7.41e-05
Q-145C	400	-18.4	325.2	6.4e-05
Q-145C	500	-20.4	324.8	4.71e-05
Q-145C	550	-19.2	317.5	3.4e-05
Q-145C	570	-18.9	320.9	4.33e-05
Q-145C	600	-18.6	318.4	3.39e-05
Q-145C	640	-19.7	322.8	3.19e-05
Q-145C	650	-19.3	324.6	3.19e-05
Q-145C	670	-20.3	325.7	2.59e-05
Q-145C	680	-21.5	321	1.41e-05
Q-146A	20	-25.8	189.9	6.1e-05	20	1
Q-146A	200	-24	184.5	4.01e-05	200	0.657
Q-146A	300	-16.7	180.6	2.55e-05	300	0.418
Q-146A	400	7.4	174.1	1.21e-05	400	0.198
Q-146A	450	13	185.9	8.95e-06	450	0.147
Q-146A	500	77.3	346.6	1.1e-05	500	0.18
Q-146A	550	68.5	337.3	1.23e-05	550	0.202
Q-146A	570	66	352.4	1.5e-05	570	0.246
Q-146A	600	77.7	346.1	1.4e-05	600	0.23
Q-146A	620	74.5	323.3	1.39e-05	620	0.228
Q-146A	640	62.9	351.2	1.36e-05	640	0.223
Q-146A	650	57.7	290.7	1.01e-05	650	0.166
Q-146A	670	75.6	339.7	7.17e-06	670	0.118
Q-146A	680	58.2	245.6	5.24e-06	680	0.0859
Q-146B	20	82.6	0.4	0.000184
Q-146B	400	77.2	21.5	6.48e-05
Q-146B	500	72.5	54.7	1.96e-05
Q-146B	550	54.7	73.2	6.82e-06
Q-146B	570	50.5	127.1	4.59e-06
Q-146B	600	11.3	119.4	2.49e-06
Q-146B	640	20.9	98.1	2.61e-06
Q-146B	650	25.7	88	3.09e-06
Q-146B	670	-2.9	114.8	2.76e-06
Q-146B	680	-46.9	199	5.63e-06
Q-146C	20	21.5	18.5	1.83e-05
Q-146C	400	48.5	17.4	9.47e-06
Q-146C	500	65.5	210.5	7.26e-06
Q-146C	550	60.4	199	6.67e-06
Q-146C	570	54.2	200.9	7.65e-06
Q-146C	600	48.9	208.7	7.27e-06
Q-146C	640	41.7	230.3	5.88e-06
Q-146C	650	52.5	215.5	6.24e-06
Q-146C	670	36.5	227.7	6.2e-06
Q-146C	680	-56.5	272.1	2e-06
Q-147A	20	59.2	358.4	4e-05	20	1
Q-147A	200	74.5	8.4	2.74e-05	200	0.685
Q-147A	300	81.2	6.2	2.42e-05	300	0.605
Q-147A	400	70.1	216.1	2.23e-05	400	0.558
Q-147A	450	59.9	206.5	2.06e-05	450	0.515
Q-147A	500	64.3	196.1	2.18e-05	500	0.545
Q-147A	550	59.6	213.9	1.94e-05	550	0.485
Q-147A	570	54.3	212.6	2.06e-05	570	0.515
Q-147A	600	53.4	215.2	1.79e-05	600	0.448
Q-147A	620	48.8	221.4	1.72e-05	620	0.43
Q-147A	640	61.1	216.3	1.61e-05	640	0.403
Q-147A	650	26.4	223.1	1.62e-05	650	0.405
Q-147A	670	-18.3	230.6	9.2e-06	670	0.23
Q-147A	680	15.7	215.6	5.43e-06	680	0.136
Q-147B	20	83.6	306.8	1.96e-05
Q-147B	400	49	201.6	2.22e-05
Q-147B	500	43.6	192	1.67e-05
Q-147B	550	41.2	188.6	1.3e-05
Q-147B	570	35.1	194.1	1.53e-05
Q-147B	600	35.5	187.9	1.33e-05
Q-147B	640	34.2	195	1.23e-05
Q-147B	650	37.4	182.8	1.16e-05
Q-147B	670	26	188.9	9.2e-06
Q-147B	680	-3.8	195.5	7.41e-06
Q-147C	20	79.2	218.5	1.94e-05
Q-147C	400	41.2	179.8	2.43e-05
Q-147C	500	26.7	181.9	2.21e-05
Q-147C	550	28.8	182.4	1.79e-05
Q-147C	570	29.8	185.1	2.04e-05
Q-147C	600	24.1	184.9	1.7e-05
Q-147C	640	27.5	186.6	1.74e-05
Q-147C	650	30.9	183.9	1.8e-05
Q-147C	670	22.4	187	1.39e-05
Q-147C	680	6.8	185.1	7.28e-06
Q-148A	20	22.7	106.7	2.48e-05	20	1
Q-148A	200	10.7	109.4	2.79e-05	200	1.13
Q-148A	300	14.6	105.4	2.87e-05	300	1.16
Q-148A	400	6.2	110.1	2.89e-05	400	1.17
Q-148A	450	5	112	2.96e-05	450	1.19
Q-148A	500	20	106.9	2.47e-05	500	0.996
Q-148A	550	17	108.8	2.03e-05	550	0.819
Q-148A	570	18.5	108.2	2.04e-05	570	0.823
Q-148A	600	18.8	115.3	1.91e-05	600	0.77
Q-148A	620	18.8	113.3	1.92e-05	620	0.774
Q-148A	640	29.4	106.4	1.69e-05	640	0.681
Q-148A	650	6.2	122.2	1.87e-05	650	0.754
Q-148A	670	7.5	133.2	1.34e-05	670	0.54
Q-148A	680	12.1	119.9	6.96e-06	680	0.281
Q-148B	20	45.4	117	1.57e-05
Q-148B	400	34.1	111	1.6e-05
Q-148B	500	40.3	102.2	1.27e-05
Q-148B	550	34.5	108.1	9.41e-06
Q-148B	570	34.8	103.4	9.74e-06
Q-148B	600	24.1	104.9	8.22e-06
Q-148B	640	27	105.4	9.1e-06
Q-148B	650	26	107.1	8.47e-06
Q-148B	670	24.5	115.8	8.53e-06
Q-148B	680	3	116.6	4.4e-06
Q-148C	20	32.2	146.9	6.82e-06
Q-148C	400	11.5	146.3	6.92e-06
Q-148C	500	24.1	139.9	5.97e-06
Q-148C	550	36.9	130.5	5.45e-06
Q-148C	570	33.1	123.6	4.68e-06
Q-148C	600	35	125.5	4.46e-06
Q-148C	640	25	138	5.2e-06
Q-148C	650	29.4	135	5.02e-06
Q-148C	670	26	148.3	5.72e-06
Q-148C	680	-8.4	147.3	3.78e-06
Q-149A	20	-43.9	313	8.37e-05	20	1
Q-149A	200	-45.2	319.3	8.59e-05	200	1.03
Q-149A	300	-45.7	323.3	8.87e-05	300	1.06
Q-149A	400	-44.7	328.2	8.76e-05	400	1.05
Q-149A	450	-47.1	322.5	8.49e-05	450	1.01
Q-149A	500	-48.5	311.4	7.29e-05	500	0.871
Q-149A	550	-49.3	323	6.54e-05	550	0.781
Q-149A	570	-48.9	312.8	6.44e-05	570	0.769
Q-149A	600	-48.5	325.3	5.9e-05	600	0.705
Q-149A	620	-49.1	309.7	5.86e-05	620	0.7
Q-149A	640	-49	304	5.61e-05	640	0.67
Q-149A	650	-48.9	323.1	5.61e-05	650	0.67
Q-149A	670	-43.8	306.1	3.17e-05	670	0.379
Q-149A	680	-45.9	316.3	1.81e-05	680	0.216
Q-149B	20	-11	261	7.5e-05
Q-149B	400	-33.9	283.5	5.35e-05
Q-149B	500	-41	295.5	3.82e-05
Q-149B	550	-44.3	295.1	3.03e-05
Q-149B	570	-46	307.9	3.49e-05
Q-149B	600	-46.2	304	3.07e-05
Q-149B	640	-46.5	314.3	3.14e-05
Q-149B	650	-47.6	307.8	2.88e-05
Q-149B	670	-42.9	311.7	1.86e-05
Q-149B	680	-38.8	314.6	8.49e-06
Q-149C	20	-54.6	310.7	6.24e-05
Q-149C	400	-58.8	310.7	6.18e-05
Q-149C	500	-59.4	295.3	4.4e-05
Q-149C	550	-57.9	300.3	3.7e-05
Q-149C	570	-59.1	314.2	4.03e-05
Q-149C	600	-60.3	312.5	3.53e-05
Q-149C	640	-64.7	313.6	3.77e-05
Q-149C	650	-62.5	309.8	3.66e-05
Q-149C	670	-61.9	303.7	2.64e-05
Q-149C	680	-60.9	310.9	1.08e-05
Q-150A	20	-27	306.3	0.000142	20	1
Q-150A	200	-24.3	310.8	0.000125	200	0.88
Q-150A	300	-23.8	307.9	0.000115	300	0.81
Q-150A	400	-22.5	297.4	0.000103	400	0.725
Q-150A	450	-21.6	315.3	9.55e-05	450	0.673
Q-150A	500	-22.3	298.5	7.12e-05	500	0.501
Q-150A	550	-19.7	316.7	6.03e-05	550	0.425
Q-150A	570	-18.5	313.6	5.88e-05	570	0.414
Q-150A	600	-20.7	321.1	5.52e-05	600	0.389
Q-150A	620	-19.3	308.9	5.44e-05	620	0.383
Q-150A	640	-20.6	301.7	5.13e-05	640	0.361
Q-150A	650	-19.2	320.2	5.13e-05	650	0.361
Q-150A	670	-13.5	324.3	2.86e-05	670	0.201
Q-150A	680	-19.7	311.7	1.75e-05	680	0.123
Q-150B	20	-26.8	326.8	7.42e-05
Q-150B	400	-24.3	329.3	6.81e-05
Q-150B	500	-20.6	323.1	4.89e-05
Q-150B	550	-20.7	326.6	3.9e-05
Q-150B	570	-20.6	330.7	3.97e-05
Q-150B	600	-17.7	331.8	3.63e-05
Q-150B	640	-20	327	3.78e-05
Q-150B	650	-17.7	329.8	3.69e-05
Q-150B	670	-18.8	335	2.68e-05
Q-150B	680	-14.7	325.7	1.37e-05
Q-150C	20	-19.8	324	5.81e-05
Q-150C	400	-23	324.8	6.35e-05
Q-150C	500	-22.9	322.5	4.66e-05
Q-150C	550	-21.4	322.7	3.76e-05
Q-150C	570	-19.5	330.9	3.83e-05
Q-150C	600	-20.4	327.2	3.56e-05
Q-150C	640	-22	325.4	3.87e-05
Q-150C	650	-23.8	325.5	3.6e-05
Q-150C	670	-22	326.9	2.77e-05
Q-150C	680	-26.5	317.6	1.79e-05
Q-151A	20	-30	312.6	0.0001	20	1
Q-151A	200	-31.2	312.3	9.95e-05	200	0.995
Q-151A	300	-33.3	308.6	0.000104	300	1.04
Q-151A	400	-41.7	299.7	0.000104	400	1.04
Q-151A	450	-29.1	314.3	9.84e-05	450	0.984
Q-151A	500	-35.9	303.1	8.47e-05	500	0.847
Q-151A	550	-31.4	310.3	7.79e-05	550	0.779
Q-151A	570	-33.1	309.5	7.4e-05	570	0.74
Q-151A	600	-29.8	313.5	7.11e-05	600	0.711
Q-151A	620	-33.9	307.6	6.81e-05	620	0.681
Q-151A	640	-39.8	302.7	6.47e-05	640	0.647
Q-151A	650	-30.5	312.3	5.98e-05	650	0.598
Q-151A	670	-25.1	320.2	3.27e-05	670	0.327
Q-151A	680	-30.6	306.7	2.39e-05	680	0.239
Q-151B	400	-30	322.9	7.49e-05
Q-151B	500	-32.1	318.1	7.22e-05
Q-151B	550	-30.6	318	5.55e-05
Q-151B	570	-33.5	316.2	6.73e-05
Q-151B	600	-34.5	316.9	6.63e-05
Q-151B	640	-37.8	316	5.69e-05
Q-151B	650	-33.9	319.6	5.95e-05
Q-151B	670	-45.9	308.1	1.96e-05
Q-151B	680	-38.5	273.6	7.19e-06
Q-151C	400	-33.6	307	7.06e-05
Q-151C	500	-34.4	306.7	6.32e-05
Q-151C	550	-34.2	308.2	5.28e-05
Q-151C	570	-32.7	310.8	6.08e-05
Q-151C	600	-34.7	309.8	5.83e-05
Q-151C	640	-38	309.2	4.99e-05
Q-151C	650	-32.4	313.7	5.1e-05
Q-151C	670	-32.2	307.3	2.64e-05
Q-151C	680	-22.9	343.5	4.35e-06
Q-152A	20	11.3	87.7	7.1e-05	20	1
Q-152A	200	7.1	67.6	5.22e-05	200	0.735
Q-152A	300	3.1	47.4	4.55e-05	300	0.641
Q-152A	400	-7.2	24.4	4.48e-05	400	0.631
Q-152A	450	-4.5	23.1	4.06e-05	450	0.572
Q-152A	500	-17.1	0	3.65e-05	500	0.514
Q-152A	550	-5	357.8	3.88e-05	550	0.546
Q-152A	570	-7	352.3	3.67e-05	570	0.517
Q-152A	600	-6.7	350.8	3.81e-05	600	0.537
Q-152A	620	-19.3	345.3	3.56e-05	620	0.501
Q-152A	640	-19.8	343	3.41e-05	640	0.48
Q-152A	650	-13.3	347.2	3.1e-05	650	0.437
Q-152A	670	-30.1	331.4	1.47e-05	670	0.207
Q-152A	680	-14.6	344.5	1.14e-05	680	0.161
Q-152B	400	-4.9	3.1	2.45e-05
Q-152B	500	-4.4	3	1.98e-05
Q-152B	550	-5.2	354.5	1.71e-05
Q-152B	570	-2	4.7	2e-05
Q-152B	600	-6.3	5.1	1.84e-05
Q-152B	640	-11.1	1.3	1.66e-05
Q-152B	650	-16.2	358.1	1.41e-05
Q-152B	670	-12.6	5.2	5.62e-06
Q-152B	680	-58	168.7	3.57e-06
Q-152C	400	-37.3	35.4	2.43e-05
Q-152C	500	-28.7	11.3	1.97e-05
Q-152C	550	-21.3	357.7	1.58e-05
Q-152C	570	-11	0.9	2.15e-05
Q-152C	600	-15.9	354.5	1.99e-05
Q-152C	640	-22.1	355.2	1.77e-05
Q-152C	650	-22	354.6	1.61e-05
Q-152C	670	-35.2	336.1	7.85e-06
Q-152C	680	-65.3	315	2.73e-06
Q-153A	20	-14.8	329.9	3.72e-05	20	1
Q-153A	200	-26.6	318.2	3.12e-05	200	0.839
Q-153A	300	-28.6	316	3.24e-05	300	0.871
Q-153A	400	-23.9	306.1	3.13e-05	400	0.841
Q-153A	450	-29.4	309.8	3.14e-05	450	0.844
Q-153A	500	-27.3	309.1	2.79e-05	500	0.75
Q-153A	550	-35	316.5	2.71e-05	550	0.728
Q-153A	570	-35.4	313.5	2.53e-05	570	0.68
Q-153A	600	-33.2	315.9	2.32e-05	600	0.624
Q-153A	620	-35.3	305.2	2.43e-05	620	0.653
Q-153A	640	-30.6	304.9	2.19e-05	640	0.589
Q-153A	650	-37.2	309.4	2.28e-05	650	0.613
Q-153A	670	-39	283.5	1.43e-05	670	0.384
Q-153A	680	-21.4	294.4	6.63e-06	680	0.178
Q-153B	400	-44.9	325	3.14e-05
Q-153B	500	-43.1	317.8	2.68e-05
Q-153B	550	-45.2	315.2	2.24e-05
Q-153B	570	-47	327.6	2.75e-05
Q-153B	600	-46.7	319.3	2.62e-05
Q-153B	640	-40.6	311.3	2.04e-05
Q-153B	650	-41.8	315.7	2.13e-05
Q-153B	670	-38.3	304.4	7.88e-06
Q-153B	680	-40.5	294	2.78e-06
Q-153C	400	-35.7	323.1	3.01e-05
Q-153C	500	-36.9	326.8	2.8e-05
Q-153C	550	-38.2	323.2	2.19e-05
Q-153C	570	-39.2	321.3	2.73e-05
Q-153C	600	-41.1	320	2.73e-05
Q-153C	640	-37.4	306.2	2.34e-05
Q-153C	650	-38.4	316.9	2.28e-05
Q-153C	670	-34.6	315.5	1.02e-05
Q-153C	680	-16.7	305	4.23e-06
Q-154A	20	6.2	309.9	1.44e-05	20	1
Q-154A	200	1.8	305.3	1.44e-05	200	1
Q-154A	300	4.9	302.5	1.46e-05	300	1.01
Q-154A	400	2.2	298.6	1.54e-05	400	1.07
Q-154A	450	-5.4	297.5	1.49e-05	450	1.03
Q-154A	500	-6.4	287.7	1.11e-05	500	0.771
Q-154A	550	-15.5	300.4	1.1e-05	550	0.764
Q-154A	570	-12.9	302.9	1.01e-05	570	0.701
Q-154A	600	-8.6	300.5	9.66e-06	600	0.671
Q-154A	620	-23.7	306.2	9.77e-06	620	0.678
Q-154A	640	-21.1	293.1	8.99e-06	640	0.624
Q-154A	650	-17.9	302.4	1.03e-05	650	0.715
Q-154A	670	-27	262.5	6.54e-06	670	0.454
Q-154A	680	9.4	291	4.42e-06	680	0.307
Q-154B	400	50.3	316.9	5.39e-06
Q-154B	500	22.4	312.6	5.68e-06
Q-154B	550	14.2	319.7	5.78e-06
Q-154B	570	14.4	330.5	6.5e-06
Q-154B	600	5.3	332.3	8.2e-06
Q-154B	640	-5.4	331.2	6.53e-06
Q-154B	650	7.9	328.1	7.66e-06
Q-154B	670	-25.8	329	4.79e-06
Q-154B	680	-47.5	298.3	1.03e-06
Q-154C	400	23.8	316	1.09e-05
Q-154C	500	10.2	313	1.03e-05
Q-154C	550	8.7	312.6	8.47e-06
Q-154C	570	6	313.6	1.11e-05
Q-154C	600	4.9	318.7	1.12e-05
Q-154C	640	-6.5	312.4	1.08e-05
Q-154C	650	-6.7	316.4	1.01e-05
Q-154C	670	-10.2	314.3	6.34e-06
Q-154C	680	-16	301.1	3.84e-06
Q-155A	20	8.6	317.1	2e-05	20	1
Q-155A	200	-6.7	312.2	1.95e-05	200	0.975
Q-155A	300	-5.8	308.1	1.91e-05	300	0.955
Q-155A	400	-6.7	306.9	1.91e-05	400	0.955
Q-155A	450	-13	304.5	1.92e-05	450	0.96
Q-155A	500	-2	303.1	1.88e-05	500	0.94
Q-155A	550	-10.7	305.3	1.81e-05	550	0.905
Q-155A	570	-10.4	306.4	1.68e-05	570	0.84
Q-155A	600	-10.4	302.8	1.63e-05	600	0.815
Q-155A	620	-11.5	300.9	1.59e-05	620	0.795
Q-155A	640	-7.6	300.7	1.52e-05	640	0.76
Q-155A	650	-19.6	300.5	1.58e-05	650	0.79
Q-155A	670	-19.1	296.5	1.29e-05	670	0.645
Q-155A	680	-11	297.8	8.26e-06	680	0.413
Q-155B	400	-4.7	295.1	7.32e-06
Q-155B	500	-19.6	283.5	6.66e-06
Q-155B	550	-21.1	273.2	5.59e-06
Q-155B	570	-32.8	270.2	8.26e-06
Q-155B	600	-26.6	274.4	8.06e-06
Q-155B	640	-20.4	271.5	6.7e-06
Q-155B	650	-21.2	271.8	6.86e-06
Q-155B	670	-22.1	262.4	4.49e-06
Q-155B	680	-11.8	260.1	3.28e-06
Q-155C	400	-17.6	310.7	1.05e-05
Q-155C	500	-26.6	305.5	8.54e-06
Q-155C	550	-28.5	311	6.94e-06
Q-155C	570	-28.8	308.6	8.64e-06
Q-155C	600	-30.4	311.6	8.82e-06
Q-155C	640	-26.2	308	6.47e-06
Q-155C	650	-28.1	304.1	6.78e-06
Q-155C	670	-22.2	297.7	4.2e-06
Q-155C	680	-17.2	291.5	2.46e-06
Q-156A	20	-42	332.6	1.77e-05	20	1
Q-156A	200	-37.8	332.3	1.6e-05	200	0.904
Q-156A	300	-37	327.8	1.58e-05	300	0.893
Q-156A	400	-38.8	326.5	1.61e-05	400	0.91
Q-156A	450	-26.7	331.8	1.65e-05	450	0.932
Q-156A	500	-27.2	323.1	1.58e-05	500	0.893
Q-156A	550	-25.1	334.6	1.5e-05	550	0.847
Q-156A	570	-32.5	330.7	1.24e-05	570	0.701
Q-156A	600	-29.4	335.5	1.19e-05	600	0.672
Q-156A	620	-27.7	327.5	1.19e-05	620	0.672
Q-156A	640	-34.7	326	9.5e-06	640	0.537
Q-156A	650	-17.1	341.1	1.06e-05	650	0.599
Q-156A	670	4.5	347.2	9.97e-06	670	0.563
Q-156A	680	-18.7	295.1	2.52e-06	680	0.142
Q-156B	400	-40.3	340	6.89e-06
Q-156B	500	-35.2	345	6.24e-06
Q-156B	550	-28.8	345.8	5.69e-06
Q-156B	570	-34.2	337.6	7.57e-06
Q-156B	600	-39.1	337.6	6.7e-06
Q-156B	640	-32.3	348.3	5.66e-06
Q-156B	650	-37.3	337.3	6.51e-06
Q-156B	670	-21.3	12.6	3.53e-06
Q-156B	680	-40.2	354.3	2.6e-06
Q-156C	400	-38.9	347	6.86e-06
Q-156C	500	-32.3	356.8	5.47e-06
Q-156C	550	-32.3	351.3	4.54e-06
Q-156C	570	-45.5	354.4	5.31e-06
Q-156C	600	-39.6	1.9	5.33e-06
Q-156C	640	-27.8	12.1	4.35e-06
Q-156C	650	-54.8	356.7	4.47e-06
Q-156C	670	-21.5	353	2.91e-06
Q-156C	680	-44	108	1.89e-06
Q-157A	20	-25.5	330.1	3.1e-05	20	1
Q-157A	200	-35.3	330.5	3.16e-05	200	1.02
Q-157A	300	-38.5	329.8	3.22e-05	300	1.04
Q-157A	400	-47.7	329.9	3.22e-05	400	1.04
Q-157A	450	-36.6	327.3	3.22e-05	450	1.04
Q-157A	500	-46.1	329.3	3.08e-05	500	0.994
Q-157A	550	-37.2	327.6	3.29e-05	550	1.06
Q-157A	570	-37.9	328.1	2.59e-05	570	0.835
Q-157A	600	-37.5	328.9	2.53e-05	600	0.816
Q-157A	620	-44.9	327.7	2.47e-05	620	0.797
Q-157A	640	-57.2	327.2	2.32e-05	640	0.748
Q-157A	650	-42.3	327.3	2.01e-05	650	0.648
Q-157A	670	-71.8	329.1	1.1e-05	670	0.355
Q-157A	680	-51.7	85.5	2.64e-06	680	0.0852
Q-157B	400	-26.4	319.6	1.51e-05
Q-157B	500	-29.6	317.9	1.34e-05
Q-157B	550	-32.6	320.2	1.15e-05
Q-157B	570	-30.9	325.2	1.45e-05
Q-157B	600	-32.4	325.5	1.28e-05
Q-157B	640	-44.3	325	1.13e-05
Q-157B	650	-35.4	325.2	1.17e-05
Q-157B	670	-47.4	320.7	7.68e-06
Q-157B	680	-4.5	321.8	4.48e-06
Q-157C	400	-43	305.5	3.2e-05
Q-157C	500	-45.3	305.4	2.9e-05
Q-157C	550	-46	307.6	2.55e-05
Q-157C	570	-41	309.2	3.14e-05
Q-157C	600	-46.8	306.2	2.98e-05
Q-157C	640	-51.7	300	2.14e-05
Q-157C	650	-42.9	303.7	2.72e-05
Q-157C	670	-45.6	303.1	1.69e-05
Q-157C	680	-15.4	305.6	7.9e-06
Q-158A	20	-48.6	35.5	4.1e-05	20	1
Q-158A	200	-47.4	40.9	4.28e-05	200	1.04
Q-158A	300	-48	40.1	4.38e-05	300	1.07
Q-158A	400	-48.4	49	4.39e-05	400	1.07
Q-158A	450	-50	40	4.41e-05	450	1.08
Q-158A	500	-48.7	47.7	4.36e-05	500	1.06
Q-158A	550	-52.5	31.2	3.35e-05	550	0.817
Q-158A	570	-51.5	41.9	3.2e-05	570	0.78
Q-158A	600	-52.1	34.5	3.13e-05	600	0.763
Q-158A	620	-54.5	44.9	3.01e-05	620	0.734
Q-158A	640	-53.8	52.9	2.89e-05	640	0.705
Q-158A	650	-52.2	45.8	2.89e-05	650	0.705
Q-158A	670	-54	61.8	2.06e-05	670	0.502
Q-158A	680	-47	74.9	5.63e-06	680	0.137
Q-158B	400	-71	46.9	3.25e-05
Q-158B	500	-72.1	47.4	2.82e-05
Q-158B	550	-71.8	49.5	2.47e-05
Q-158B	570	-67.1	48.1	2.91e-05
Q-158B	600	-67.8	44	2.87e-05
Q-158B	640	-69.7	79.3	2.1e-05
Q-158B	650	-67.5	44.4	2.49e-05
Q-158B	670	-75.2	61.4	1.88e-05
Q-158B	680	-75.4	1.2	9.54e-06
Q-158C	400	-64.4	26.8	2.65e-05
Q-158C	500	-65.2	33.7	2.34e-05
Q-158C	550	-64.6	30.2	2.05e-05
Q-158C	570	-60.3	27.8	2.31e-05
Q-158C	600	-61.4	27.8	2.19e-05
Q-158C	640	-70.3	49.1	1.47e-05
Q-158C	650	-60.6	24.9	1.89e-05
Q-158C	670	-66.5	12.4	1.38e-05
Q-158C	680	-29.2	64.4	2.17e-06
Q-159A	20	26.3	140.7	4.73e-05	20	1
Q-159A	200	27.5	141.2	4.8e-05	200	1.01
Q-159A	300	27.1	141.6	4.87e-05	300	1.03
Q-159A	400	24.5	136.5	4.69e-05	400	0.992
Q-159A	450	24.1	144.5	4.55e-05	450	0.962
Q-159A	500	26.2	141.1	4.49e-05	500	0.949
Q-159A	550	21.9	137.8	3.29e-05	550	0.696
Q-159A	570	20.8	142.7	3.11e-05	570	0.658
Q-159A	600	24.5	141.8	2.92e-05	600	0.617
Q-159A	620	16.5	139.8	2.77e-05	620	0.586
Q-159A	640	18.1	123.3	2.76e-05	640	0.584
Q-159A	650	17.6	143.1	2.57e-05	650	0.543
Q-159A	670	-0.1	146.3	1.67e-05	670	0.353
Q-159A	680	3.2	123.3	5.88e-06	680	0.124
Q-159B	20	14.6	113.7	4.07e-05
Q-159B	400	-0.8	126.3	4.42e-05
Q-159B	500	-2.7	125.9	3.87e-05
Q-159B	550	-8.1	124.8	3.44e-05
Q-159B	570	6.1	131.3	4.2e-05
Q-159B	600	6.3	132	3.93e-05
Q-159B	640	-13	121.2	2.51e-05
Q-159B	650	-0.3	128.5	3.34e-05
Q-159B	670	-9.9	125.3	1.09e-05
Q-159B	680	-64.6	191.3	2.04e-06
Q-159C	20	12	118.5	4.65e-05
Q-159C	400	2.3	135	3.99e-05
Q-159C	500	3.8	134.8	3.71e-05
Q-159C	550	5	135.6	3.88e-05
Q-159C	570	13.9	140.5	4.69e-05
Q-159C	600	15.6	140.3	4.34e-05
Q-159C	640	-1.7	130.9	2.69e-05
Q-159C	650	10.8	138.3	3.72e-05
Q-159C	670	-3.6	131	1.27e-05
Q-159C	680	-15	165	3.79e-06
Q-160A	20	24.6	150.8	7.74e-05	20	1
Q-160A	200	19.4	151.6	8e-05	200	1.03
Q-160A	300	22.2	152.8	7.99e-05	300	1.03
Q-160A	400	29.9	157.8	8.17e-05	400	1.06
Q-160A	450	19.3	151.6	8.32e-05	450	1.07
Q-160A	500	29.1	157	8.23e-05	500	1.06
Q-160A	550	13.2	152.7	6.41e-05	550	0.828
Q-160A	570	15.6	154.2	6.2e-05	570	0.801
Q-160A	600	13.9	154.4	5.82e-05	600	0.752
Q-160A	620	11.4	153.3	5.55e-05	620	0.717
Q-160A	640	20.6	160.3	4.86e-05	640	0.628
Q-160A	650	9.5	151.8	5.11e-05	650	0.66
Q-160A	670	15	151.4	4.25e-05	670	0.549
Q-160A	680	16.6	163.1	1.67e-05	680	0.216
Q-160B	20	24.9	143.2	5.31e-05
[truncated: 3,254 more rows]
[truncated: 5 more columns]
